# Supplementary material
Source: HighWire-hosted journal article supplement (https://bmjophth.bmj.com/content/9/1/e001565)
Supplement: inline-supplementary-material-1 [file inline-supplementary-material-1.pdf]

**Supplementary Table 1:** Table depicting the ocular tumour-associated genes, their location, function, and associated diseases.

| Gene: | Location: | Function:                                                                                                                                                          | Disease:                                                                                                        |
|-------|-----------|--------------------------------------------------------------------------------------------------------------------------------------------------------------------|-----------------------------------------------------------------------------------------------------------------|
| ABCG2 | 4q22.1    | ATP Binding Cassette Subfamily G Member 2                                                                                                                          | Retinoblastoma                                                                                                  |
| APC   | 5q22.2    | Tumour suppressor gene. Regulator of Wnt Signalling Pathway.                                                                                                       | Congenital hypertrophy of retinal pigment epithelium, Gardner syndrome, ocular surface squamous cell neoplasia. |
| BAP1  | 3p21.1    | Tumour suppressor gene. A deubiquitylase, thought to be a key regulator of cell cycle, growth, response to DNA damage and chromatin dynamics.                      | Uveal melanoma, conjunctival melanoma                                                                           |
| BRAF  | 7q34      | Proto-oncogene. Raf family of serine/threonine kinases. Key regulator MAP kinase/ ERK signalling pathway, affecting cell division, differentiation, and secretion. | Conjunctival melanoma, cutaneous melanoma, uveal melanoma                                                       |
| BRCA2 | 13q13.1   | Tumour suppressor gene. DNA Repair Associated.                                                                                                                     | Uveal melanoma                                                                                                  |
| CCND1 | 11q13.3   | Proto-oncogene. Regulatory protein in G1/S transition of cell cycle.                                                                                               | Von Hippel-Lindau Syndrome, Uveal melanoma                                                                      |
| CDK4  | 12q14.1   | Proto-oncogene. Serine/threonine kinase involved in cell cycle regulation and repair of damage caused by UV radiation.                                             | Uveal melanoma, conjunctival melanoma                                                                           |
| CDK6  | 7q21.2    | Proto-oncogene. Serine/threonine kinase involved in cell cycle and differentiation; promotes G1/S transition.                                                      | Uveal melanoma, conjunctival melanoma                                                                           |

|         |          |                                                                                                                                                                                                                                              |                                                              |
|---------|----------|----------------------------------------------------------------------------------------------------------------------------------------------------------------------------------------------------------------------------------------------|--------------------------------------------------------------|
| CDKN2A  | 9p21.3   | Tumour suppressor gene. Capable of inducing cell cycle arrest in G1 and G2 phases.                                                                                                                                                           | Uveal melanoma, neurofibromatosis                            |
| CTC1    | 17p13.1  | Putative tumour suppressor gene. Component <i>CST</i> complex believed to play a role in promoting DNA replication.                                                                                                                          | Cerebroretinal microangiopathy with calcifications and cysts |
| CTNNB1  | 3p22.1   | Proto-oncogene. Key downstream component of canonical Wnt signalling pathway.                                                                                                                                                                | Teratocarcinosarcoma of the eye                              |
| CYSLTR2 | 13q14.2  | Proto-oncogene. Involved in the production and activity of inflammatory mediators.                                                                                                                                                           | Uveal melanoma                                               |
| DICER1  | 14q32.13 | Haploinsufficient tumour suppressor gene with loss of one allele leading to tumour progression but loss of both alleles having an inhibitory effect on tumour development. Endoribonuclease involved in post-transcriptional gene silencing. | Ciliary body medulloepithelioma, rhabdomyosarcoma            |
| DMPK    | 19q13.32 | Mediator of tumour suppressor genes. Various functions including maintenance of skeletal/ cardiac muscle structure and function, synaptic plasticity and regulation of chloride currents.                                                    | Uveal melanoma                                               |
| DUX4    | 4q35.2   | Tumour suppressor/ proto-oncogene. Transcription factor involved in embryogenesis, physiology & disease.                                                                                                                                     | Coats-like syndrome, exudative retinopathy                   |
| EIF1AX  | Xp22.12  | Proto-oncogene. Encodes an essential eukaryotic                                                                                                                                                                                              | Uveal melanoma                                               |

|       |          |                                                                                                                                                          |                                                                              |
|-------|----------|----------------------------------------------------------------------------------------------------------------------------------------------------------|------------------------------------------------------------------------------|
|       |          | translation initiation factor. Required for binding of 43S complex to the 5' end of capped RNA.                                                          |                                                                              |
| ERCC2 | 19q13.32 | DNA repair gene involved in separating the double helix via the 5'-3' helicase activity.                                                                 | Xeroderma pigmentosum, ocular squamous cell carcinoma                        |
| FHIT  | 3p14.2   | Tumour suppressor gene. Important in regulation of apoptosis. Involved in purine metabolism.                                                             | Uveal melanoma                                                               |
| FLCN  | 17p11.2  | Tumour suppressor gene. Multi-functional protein, involved in both the cellular response to amino acid availability and in the regulation of glycolysis. | Birt-Hogg-Dubé syndrome, choroidal melanoma, uveal melanoma, lid folliculoma |
| GNA11 | 19p13.3  | Proto-oncogene. G Protein Subunit Alpha 11                                                                                                               | Uveal melanoma, choroidal                                                    |
| GNAQ  | 9q21.2   | Proto-oncogene. G Protein Subunit Alpha Q                                                                                                                | Sturge weber syndrome, uveal melanoma, nevus of ota                          |
| KDM4C | 9p24.1   | Regulator of oncogenes and tumour suppressor genes. Nuclear protein involved in histone modification and a regulator of several transcription factors.   | Uveal melanoma                                                               |
| KIF11 | 10q23.33 | Proto-oncogene. Protein involved in spindle dynamics during mitosis. Also involved in retinal vascular development.                                      | Familial exudative vitreoretinopathy                                         |
| LRP5  | 11q13.2  | This gene encodes a transmembrane low-density lipoprotein receptor that binds and internalises ligands in the process of receptor-mediated endocytosis   | Osteoporosis-pseudoglioma syndrome                                           |

|          |                 |                                                                                                                                                                           |                                                                            |
|----------|-----------------|---------------------------------------------------------------------------------------------------------------------------------------------------------------------------|----------------------------------------------------------------------------|
| MAPKAPK5 | 12q24.12-q24.13 | Tumour suppressor gene. Serine/threonine kinase involved in cellular stress and inflammatory response.                                                                    | Uveal melanoma                                                             |
| MC1R     | 16q24.3         | Tumour suppressor gene. Encodes melanocortin one receptor.                                                                                                                | Uveal melanoma                                                             |
| MDM2     | 12q15           | Important negative regulator of <i>p53</i> tumour suppressor.                                                                                                             | Uveal melanoma, retinoblastoma                                             |
| MITF     | 3p13            | Tumour suppressor gene. Regulates differentiation and development of melanocytes and retinal pigment epithelium.                                                          | Uveal melanoma                                                             |
| MLANA    | 9p24.1          | Protein antigen found on the surface of melanocytes.                                                                                                                      | Uveal melanoma, conjunctival melanoma, malignant spindle cell melanoma     |
| MLH1     | 3p22.2          | Tumour suppressor gene. Involved in post-replicative DNA mismatch repair.                                                                                                 | Keratocanthoma, Muir-Torre syndrome, sebaceous adenoma, cutaneous melanoma |
| MYC      | 8p24.21         | Proto-oncogene. Multifunctional, nuclear phosphoprotein involved in cell cycle, cell growth, apoptosis, metabolism, biosynthesis, adhesion, and mitochondrial biogenesis. | Uveal melanoma                                                             |
| MSH2     | 2p21-p16        | Tumour suppressor gene. Protein involved in post-replicative DNA mismatch repair system.                                                                                  | Sebaceous adenoma, cutaneous melanoma, uveal melanoma                      |
| MYD88    | 3p22.2          | Proto-oncogene. Adapter protein involved in <i>Toll-like</i> receptor and <i>IL-1</i> receptor signalling pathway in innate immune response.                              | Vitreoretinal lymphoma                                                     |

|       |               |                                                                                                                                                                        |                                                                                            |
|-------|---------------|------------------------------------------------------------------------------------------------------------------------------------------------------------------------|--------------------------------------------------------------------------------------------|
| NDP   | Xp11.3        | Activates the canonical Wnt signalling pathway through <i>FZD4</i> and <i>LRP5</i> coreceptor. Involved in retinal vascularisation.                                    | Coats, familial exudative vitreoretinopathy, persistent foetal vasculature, Norrie disease |
| NF1   | 17q11.2       | Tumour suppressor gene. Appears to be a negative regulator of the ras signal transduction pathway.                                                                     | Multiple including, Lisch nodules, optic gliomas, capillary haemangiomas                   |
| NF2   | 22q12.2       | Tumour suppressor gene. Involved in regulation of contact-dependent inhibition of cell proliferation and functions in cell-cell adhesion and transmembrane signalling. | Hamartomas                                                                                 |
| NRAS  | 1p13.2        | Proto-oncogene. Regulatory protein in cell division.                                                                                                                   | Conjunctival melanoma, uveal melanoma, cutaneous melanoma                                  |
| PDCD1 | 2q37.3        | Tumour suppressor gene. Immune-inhibitory receptor expressed in activated T cells; involved in regulation T cell function.                                             | Conjunctival squamous cell carcinoma, uveal melanoma                                       |
| PLAG1 | 8q12.1        | Proto-oncogene. Involved in cell proliferation by regulating a wide array of target genes.                                                                             | Pleomorphic adenoma lacrimal gland                                                         |
| PLCB4 | 20p12.3-p12.2 | Proto-oncogene. Encoding form of <i>phospholipase C</i> involved in <i>phosphoinositide cycle</i> .                                                                    | Uveal melanoma                                                                             |
| POT1  | 7q31.33       | Encodes a protein involved in telomere maintenance.                                                                                                                    | Uveal melanoma                                                                             |
| PRDX3 | 10q26.11      | Mitochondrial protein with antioxidant function.                                                                                                                       | Uveal melanoma                                                                             |
| PTCH1 | 9q22.32       | Tumour suppressor gene. Acts as a receptor for Sonic Hedgehog ( <i>SHH</i> ).                                                                                          | Ocular surface squamous cell neoplasia, retinoblastoma, basal cell                         |

|       |          |                                                                                                                                                     |                                                                                                                              |
|-------|----------|-----------------------------------------------------------------------------------------------------------------------------------------------------|------------------------------------------------------------------------------------------------------------------------------|
|       |          |                                                                                                                                                     | carcinoma, Gorlin-Goltz syndrome, orbital teratoma                                                                           |
| PTCH2 | 1q34.1   | Tumour suppressor gene. Role in control of cellular growth may be a receptor for <i>SHH</i> .                                                       | Gorlin-Goltz syndrome,                                                                                                       |
| PTEN  | 10q23.31 | Tumour suppressor gene. Acts as a dual-specificity protein phosphatase, dephosphorylating tyrosine-, serine- and threonine-phosphorylated proteins. | Cowden syndrome, retinoblastoma, conjunctival melanoma, uveal melanoma, PTEN hamartoma tumour syndrome, choroidal schwannoma |
| RB1   | 13q14.2  | Tumour suppressor gene. Key regulator of G1/S transition of cell cycle.                                                                             | Retinoblastoma, ocular sebaceous carcinoma                                                                                   |
| RBL1  | 20q11.23 | Likely to be a tumour suppressor gene. Key regulator of entry into cell division.                                                                   | Retinoblastoma                                                                                                               |
| SF3B1 | 2q33.1   | Proto-oncogene. Involved in pre-mRNA splicing as a component of the splicing factor <i>SF3B</i> complex.                                            | Uveal melanoma, conjunctival melanoma                                                                                        |
| SRSF2 | 17q25.1  | Proto-oncogene. Necessary for the regulation of gene transcription, pre-mRNA splicing, mRNA transport and stability.                                | Uveal melanoma, iris and ciliary melanocytoma                                                                                |
| SUFU  | 10q24.32 | Tumour suppressor gene. Negative regulator in the hedgehog/smoothened signalling pathway.                                                           | Retinoblastoma, conjunctival melanoma                                                                                        |
| TERT  | 5p15.33  | Tumour suppressor gene. Encodes telomerase a ribonucleoprotein enzyme essential for the replication of chromosome termini in most eukaryotes.       | Uveal melanoma, conjunctival melanoma                                                                                        |

|       |         |                                                                                                                                                    |                                                                                                        |
|-------|---------|----------------------------------------------------------------------------------------------------------------------------------------------------|--------------------------------------------------------------------------------------------------------|
| TP53  | 17p13.1 | Tumour suppressor gene implicated in many tumour types; induces growth arrest or apoptosis depending on physiological circumstances and cell type. | Ocular surface squamous cell neoplasia, Li-Fraumeni syndrome, orbital rhabdomyosarcoma, uveal melanoma |
| TSC1  | 9q34.13 | Tumour suppressor gene. Encodes growth inhibitory protein hamartin.                                                                                | Tuberous sclerosis                                                                                     |
| TSC2  | 16p13.3 | Tumour suppressor gene. Encodes growth inhibitory protein tuberlin.                                                                                | Tuberous sclerosis                                                                                     |
| U2AF1 | 21q22.3 | Encodes an RNA-binding protein involved in the recognition of the 3' splice site required for recruitment of U2 snRNP during pre-mRNA splicing.    | Uveal melanoma                                                                                         |
| VHL   | 3p25.3  | Tumour suppressor gene. Involved in ubiquitination and subsequent proteasomal degradation via von Hippel-Lindau ubiquitination complex.            | Von Hippel-Lindau, Hemangioblastoma                                                                    |
| XPA   | 9q22.33 | Involved in DNA excision repair.                                                                                                                   | Ocular squamous cell carcinoma, pterygium, pinguecula, conjunctival melanoma                           |
