# Supplementary material
Source: HighWire-hosted journal article supplement (https://bmjophth.bmj.com/content/9/1/e001565)
Supplement: inline-supplementary-material-2 [file inline-supplementary-material-2.pdf]

**Supplementary Table 2: PANTHER Overrepresentation Test (Haploinsufficient Ocular Tumour-Associated Genes)**

| Analysis Type:                                                      |                                |                            |                                  | PANTHER Overrepresentation Test (Released 20221013)                  |                                         |                                     |                             |
|---------------------------------------------------------------------|--------------------------------|----------------------------|----------------------------------|----------------------------------------------------------------------|-----------------------------------------|-------------------------------------|-----------------------------|
| Annotation Version and Release Date:                                |                                |                            |                                  | GO Ontology database DOI: 10.5281/zenodo.7942786 Released 2023-05-10 |                                         |                                     |                             |
| Analyzed List:                                                      |                                |                            |                                  | Client Text Box Input (Homo sapiens)                                 |                                         |                                     |                             |
| Reference List:                                                     |                                |                            |                                  | Homo sapiens (all genes in database)                                 |                                         |                                     |                             |
| Test Type:                                                          |                                |                            |                                  | FISHER                                                               |                                         |                                     |                             |
| Correction:                                                         |                                |                            |                                  | FDR                                                                  |                                         |                                     |                             |
| GO biological process complete                                      | Homo sapiens - REFLIST (20589) | Client Text Box Input (23) | Client Text Box Input (expected) | Client Text Box Input (over/under)                                   | Client Text Box Input (fold Enrichment) | Client Text Box Input (raw P-value) | Client Text Box Input (FDR) |
| Schwann cell proliferation (GO:0014010)                             | 3                              | 2                          | .00                              | +                                                                    | > 100                                   | 1.19E-05                            | 1.14E-03                    |
| negative regulation of Schwann cell proliferation (GO:0010626)      | 8                              | 3                          | .01                              | +                                                                    | > 100                                   | 1.99E-07                            | 5.24E-05                    |
| regulation of Schwann cell proliferation (GO:0010624)               | 9                              | 3                          | .01                              | +                                                                    | > 100                                   | 2.65E-07                            | 6.34E-05                    |
| negative regulation of monocyte differentiation (GO:0045656)        | 7                              | 2                          | .01                              | +                                                                    | > 100                                   | 4.27E-05                            | 3.08E-03                    |
| negative regulation of glial cell proliferation (GO:0060253)        | 16                             | 4                          | .02                              | +                                                                    | > 100                                   | 5.64E-09                            | 2.92E-06                    |
| siRNA processing (GO:0030422)                                       | 8                              | 2                          | .01                              | +                                                                    | > 100                                   | 5.33E-05                            | 3.70E-03                    |
| neural plate development (GO:0001840)                               | 10                             | 2                          | .01                              | +                                                                    | > 100                                   | 7.81E-05                            | 4.99E-03                    |
| negative regulation of oligodendrocyte differentiation (GO:0048715) | 14                             | 2                          | .02                              | +                                                                    | > 100                                   | 1.42E-04                            | 8.14E-03                    |

|                                                                 |    |   |     |   |       |          |          |
|-----------------------------------------------------------------|----|---|-----|---|-------|----------|----------|
| regulation of glial cell proliferation (GO:0060251)             | 35 | 5 | .04 | + | > 100 | 6.97E-10 | 7.73E-07 |
| negative regulation of protein import into nucleus (GO:0042308) | 15 | 2 | .02 | + | > 100 | 1.60E-04 | 8.80E-03 |
| negative regulation of cell division (GO:0051782)               | 16 | 2 | .02 | + | > 100 | 1.80E-04 | 9.72E-03 |
| myeloid cell apoptotic process (GO:0033028)                     | 16 | 2 | .02 | + | > 100 | 1.80E-04 | 9.69E-03 |
| negative regulation of gliogenesis (GO:0014014)                 | 42 | 5 | .05 | + | > 100 | 1.62E-09 | 1.39E-06 |
| dorsal/ventral neural tube patterning (GO:0021904)              | 17 | 2 | .02 | + | > 100 | 2.01E-04 | 1.07E-02 |
| regulation of monocyte differentiation (GO:0045655)             | 19 | 2 | .02 | + | 94.23 | 2.47E-04 | 1.26E-02 |
| ectoderm development (GO:0007398)                               | 19 | 2 | .02 | + | 94.23 | 2.47E-04 | 1.26E-02 |
| glial cell proliferation (GO:0014009)                           | 30 | 3 | .03 | + | 89.52 | 6.48E-06 | 6.89E-04 |
| negative regulation of stem cell proliferation (GO:2000647)     | 22 | 2 | .02 | + | 81.38 | 3.24E-04 | 1.59E-02 |
| sympathetic nervous system development (GO:0048485)             | 22 | 2 | .02 | + | 81.38 | 3.24E-04 | 1.59E-02 |
| negative regulation of cellular senescence (GO:2000773)         | 23 | 2 | .03 | + | 77.84 | 3.52E-04 | 1.70E-02 |
| smooth muscle tissue development (GO:0048745)                   | 23 | 2 | .03 | + | 77.84 | 3.52E-04 | 1.69E-02 |

|                                                                                 |    |   |     |   |       |          |          |
|---------------------------------------------------------------------------------|----|---|-----|---|-------|----------|----------|
| negative regulation of nucleocytoplasmic transport (GO:0046823)                 | 24 | 2 | .03 | + | 74.60 | 3.81E-04 | 1.80E-02 |
| negative regulation of smoothed signaling pathway (GO:0045879)                  | 36 | 3 | .04 | + | 74.60 | 1.08E-05 | 1.05E-03 |
| positive regulation of mesenchymal cell proliferation (GO:0002053)              | 25 | 2 | .03 | + | 71.61 | 4.11E-04 | 1.92E-02 |
| regulation of vascular associated smooth muscle cell migration (GO:1904752)     | 25 | 2 | .03 | + | 71.61 | 4.11E-04 | 1.91E-02 |
| negative regulation of glial cell differentiation (GO:0045686)                  | 26 | 2 | .03 | + | 68.86 | 4.42E-04 | 2.03E-02 |
| positive regulation of transcription regulatory region DNA binding (GO:2000679) | 26 | 2 | .03 | + | 68.86 | 4.42E-04 | 2.03E-02 |
| negative regulation of myeloid leukocyte differentiation (GO:0002762)           | 53 | 4 | .06 | + | 67.56 | 4.47E-07 | 8.58E-05 |
| myelination in peripheral nervous system (GO:0022011)                           | 29 | 2 | .03 | + | 61.74 | 5.43E-04 | 2.40E-02 |
| peripheral nervous system axon ensheathment (GO:0032292)                        | 29 | 2 | .03 | + | 61.74 | 5.43E-04 | 2.40E-02 |
| spinal cord motor neuron differentiation (GO:0021522)                           | 30 | 2 | .03 | + | 59.68 | 5.79E-04 | 2.53E-02 |
| negative regulation of endothelial cell                                         | 30 | 2 | .03 | + | 59.68 | 5.79E-04 | 2.52E-02 |

|                                                                                        |    |   |     |   |       |          |          |
|----------------------------------------------------------------------------------------|----|---|-----|---|-------|----------|----------|
| apoptotic process (GO:2000352)                                                         |    |   |     |   |       |          |          |
| branching involved in ureteric bud morphogenesis (GO:0001658)                          | 46 | 3 | .05 | + | 58.38 | 2.16E-05 | 1.82E-03 |
| prostate gland development (GO:0030850)                                                | 46 | 3 | .05 | + | 58.38 | 2.16E-05 | 1.81E-03 |
| negative regulation of osteoblast differentiation (GO:0045668)                         | 48 | 3 | .05 | + | 55.95 | 2.44E-05 | 1.94E-03 |
| regulation of stem cell proliferation (GO:0072091)                                     | 80 | 5 | .09 | + | 55.95 | 3.36E-08 | 1.27E-05 |
| Schwann cell development (GO:0014044)                                                  | 32 | 2 | .04 | + | 55.95 | 6.54E-04 | 2.83E-02 |
| negative regulation of macroautophagy (GO:0016242)                                     | 32 | 2 | .04 | + | 55.95 | 6.54E-04 | 2.82E-02 |
| regulation of mesenchymal cell proliferation (GO:0010464)                              | 32 | 2 | .04 | + | 55.95 | 6.54E-04 | 2.81E-02 |
| negative regulation of osteoclast differentiation (GO:0045671)                         | 33 | 2 | .04 | + | 54.25 | 6.93E-04 | 2.97E-02 |
| neural tube patterning (GO:0021532)                                                    | 33 | 2 | .04 | + | 54.25 | 6.93E-04 | 2.96E-02 |
| positive regulation of telomerase activity (GO:0051973)                                | 34 | 2 | .04 | + | 52.66 | 7.33E-04 | 3.11E-02 |
| regulation of intrinsic apoptotic signaling pathway by p53 class mediator (GO:1902253) | 34 | 2 | .04 | + | 52.66 | 7.33E-04 | 3.10E-02 |
| negative regulation of fibroblast                                                      | 34 | 2 | .04 | + | 52.66 | 7.33E-04 | 3.09E-02 |

|                                                                                          |     |   |     |   |       |          |          |
|------------------------------------------------------------------------------------------|-----|---|-----|---|-------|----------|----------|
| proliferation (GO:0048147)                                                               |     |   |     |   |       |          |          |
| regulation of gliogenesis (GO:0014013)                                                   | 102 | 6 | .11 | + | 52.66 | 1.69E-09 | 1.38E-06 |
| hindlimb morphogenesis (GO:0035137)                                                      | 35  | 2 | .04 | + | 51.15 | 7.75E-04 | 3.26E-02 |
| positive regulation of stress fiber assembly (GO:0051496)                                | 53  | 3 | .06 | + | 50.67 | 3.24E-05 | 2.45E-03 |
| negative regulation of cell-matrix adhesion (GO:0001953)                                 | 36  | 2 | .04 | + | 49.73 | 8.17E-04 | 3.41E-02 |
| astrocyte development (GO:0014002)                                                       | 36  | 2 | .04 | + | 49.73 | 8.17E-04 | 3.40E-02 |
| osteoclast differentiation (GO:0030316)                                                  | 55  | 3 | .06 | + | 48.83 | 3.60E-05 | 2.70E-03 |
| Schwann cell differentiation (GO:0014037)                                                | 37  | 2 | .04 | + | 48.39 | 8.61E-04 | 3.53E-02 |
| positive regulation of vascular associated smooth muscle cell proliferation (GO:1904707) | 37  | 2 | .04 | + | 48.39 | 8.61E-04 | 3.52E-02 |
| ureteric bud morphogenesis (GO:0060675)                                                  | 57  | 3 | .06 | + | 47.11 | 3.98E-05 | 2.95E-03 |
| mesonephric tubule morphogenesis (GO:0072171)                                            | 58  | 3 | .06 | + | 46.30 | 4.19E-05 | 3.05E-03 |
| negative regulation of protein localization to nucleus (GO:1900181)                      | 39  | 2 | .04 | + | 45.91 | 9.51E-04 | 3.83E-02 |
| negative regulation of epithelial cell apoptotic process (GO:1904036)                    | 59  | 3 | .07 | + | 45.52 | 4.40E-05 | 3.15E-03 |
| endocardial cushion                                                                      | 40  | 2 | .04 | + | 44.76 | 9.98E-04 | 3.96E-02 |

|                                                                           |     |   |     |   |       |          |          |
|---------------------------------------------------------------------------|-----|---|-----|---|-------|----------|----------|
| morphogenesis (GO:0003203)                                                |     |   |     |   |       |          |          |
| regulation of myeloid leukocyte differentiation (GO:0002761)              | 125 | 6 | .14 | + | 42.97 | 5.43E-09 | 2.91E-06 |
| negative regulation of myeloid cell differentiation (GO:0045638)          | 84  | 4 | .09 | + | 42.63 | 2.58E-06 | 3.46E-04 |
| positive regulation of G1/S transition of mitotic cell cycle (GO:1900087) | 42  | 2 | .05 | + | 42.63 | 1.10E-03 | 4.28E-02 |
| T cell differentiation in thymus (GO:0033077)                             | 63  | 3 | .07 | + | 42.63 | 5.30E-05 | 3.71E-03 |
| positive regulation of actin filament bundle assembly (GO:0032233)        | 63  | 3 | .07 | + | 42.63 | 5.30E-05 | 3.69E-03 |
| urogenital system development (GO:0001655)                                | 64  | 3 | .07 | + | 41.96 | 5.55E-05 | 3.83E-03 |
| embryonic axis specification (GO:0000578)                                 | 43  | 2 | .05 | + | 41.64 | 1.15E-03 | 4.45E-02 |
| positive regulation of glucose transmembrane transport (GO:0010828)       | 43  | 2 | .05 | + | 41.64 | 1.15E-03 | 4.44E-02 |
| cell fate determination (GO:0001709)                                      | 44  | 2 | .05 | + | 40.69 | 1.20E-03 | 4.59E-02 |
| cell fate specification (GO:0001708)                                      | 88  | 4 | .10 | + | 40.69 | 3.08E-06 | 3.99E-04 |
| negative regulation of intracellular protein transport (GO:0090317)       | 44  | 2 | .05 | + | 40.69 | 1.20E-03 | 4.58E-02 |
| regulation of oligodendrocyte differentiation (GO:0048713)                | 44  | 2 | .05 | + | 40.69 | 1.20E-03 | 4.57E-02 |

|                                                                                       |    |   |     |   |       |          |          |
|---------------------------------------------------------------------------------------|----|---|-----|---|-------|----------|----------|
| bone remodeling (GO:0046849)                                                          | 44 | 2 | .05 | + | 40.69 | 1.20E-03 | 4.55E-02 |
| regulation of fibroblast proliferation (GO:0048145)                                   | 89 | 4 | .10 | + | 40.23 | 3.22E-06 | 4.10E-04 |
| regulation of cellular senescence (GO:2000772)                                        | 45 | 2 | .05 | + | 39.79 | 1.25E-03 | 4.74E-02 |
| autonomic nervous system development (GO:0048483)                                     | 45 | 2 | .05 | + | 39.79 | 1.25E-03 | 4.73E-02 |
| nephron tubule morphogenesis (GO:0072078)                                             | 68 | 3 | .08 | + | 39.49 | 6.60E-05 | 4.36E-03 |
| regulation of extrinsic apoptotic signaling pathway in absence of ligand (GO:2001239) | 46 | 2 | .05 | + | 38.92 | 1.30E-03 | 4.91E-02 |
| ventral spinal cord development (GO:0021517)                                          | 46 | 2 | .05 | + | 38.92 | 1.30E-03 | 4.90E-02 |
| positive regulation of stem cell proliferation (GO:2000648)                           | 46 | 2 | .05 | + | 38.92 | 1.30E-03 | 4.88E-02 |
| neural tube closure (GO:0001843)                                                      | 93 | 4 | .10 | + | 38.50 | 3.81E-06 | 4.59E-04 |
| nephron epithelium morphogenesis (GO:0072088)                                         | 70 | 3 | .08 | + | 38.36 | 7.17E-05 | 4.70E-03 |
| tube closure (GO:0060606)                                                             | 94 | 4 | .11 | + | 38.09 | 3.97E-06 | 4.71E-04 |
| regulation of osteoclast differentiation (GO:0045670)                                 | 72 | 3 | .08 | + | 37.30 | 7.78E-05 | 5.05E-03 |
| stem cell proliferation (GO:0072089)                                                  | 72 | 3 | .08 | + | 37.30 | 7.78E-05 | 5.03E-03 |
| renal tubule morphogenesis (GO:0061333)                                               | 72 | 3 | .08 | + | 37.30 | 7.78E-05 | 5.01E-03 |

|                                                                           |     |   |     |   |       |          |          |
|---------------------------------------------------------------------------|-----|---|-----|---|-------|----------|----------|
| heart valve development (GO:0003170)                                      | 72  | 3 | .08 | + | 37.30 | 7.78E-05 | 4.99E-03 |
| limbic system development (GO:0021761)                                    | 121 | 5 | .14 | + | 36.99 | 2.43E-07 | 5.89E-05 |
| nephron morphogenesis (GO:0072028)                                        | 73  | 3 | .08 | + | 36.79 | 8.09E-05 | 5.11E-03 |
| negative regulation of G1/S transition of mitotic cell cycle (GO:2000134) | 74  | 3 | .08 | + | 36.29 | 8.41E-05 | 5.29E-03 |
| primary neural tube formation (GO:0014020)                                | 99  | 4 | .11 | + | 36.17 | 4.84E-06 | 5.37E-04 |
| regulation of glial cell differentiation (GO:0045685)                     | 75  | 3 | .08 | + | 35.81 | 8.74E-05 | 5.47E-03 |
| embryonic epithelial tube formation (GO:0001838)                          | 127 | 5 | .14 | + | 35.24 | 3.06E-07 | 6.89E-05 |
| neural tube formation (GO:0001841)                                        | 106 | 4 | .12 | + | 33.78 | 6.29E-06 | 6.73E-04 |
| epithelial tube formation (GO:0072175)                                    | 135 | 5 | .15 | + | 33.15 | 4.10E-07 | 8.28E-05 |
| protein localization to chromosome (GO:0034502)                           | 81  | 3 | .09 | + | 33.15 | 1.09E-04 | 6.67E-03 |
| negative regulation of leukocyte differentiation (GO:1902106)             | 109 | 4 | .12 | + | 32.85 | 7.00E-06 | 7.29E-04 |
| negative regulation of cell cycle G1/S phase transition (GO:1902807)      | 82  | 3 | .09 | + | 32.75 | 1.13E-04 | 6.88E-03 |
| dorsal/ventral pattern formation (GO:0009953)                             | 84  | 3 | .09 | + | 31.97 | 1.21E-04 | 7.26E-03 |
| G1/S transition of mitotic cell cycle (GO:0000082)                        | 84  | 3 | .09 | + | 31.97 | 1.21E-04 | 7.23E-03 |

|                                                                         |     |   |     |   |       |          |          |
|-------------------------------------------------------------------------|-----|---|-----|---|-------|----------|----------|
| negative regulation of hemopoiesis (GO:1903707)                         | 113 | 4 | .13 | + | 31.69 | 8.03E-06 | 8.10E-04 |
| nephron tubule development (GO:0072080)                                 | 86  | 3 | .10 | + | 31.23 | 1.29E-04 | 7.64E-03 |
| cell cycle G1/S phase transition (GO:0044843)                           | 86  | 3 | .10 | + | 31.23 | 1.29E-04 | 7.62E-03 |
| ureteric bud development (GO:0001657)                                   | 88  | 3 | .10 | + | 30.52 | 1.38E-04 | 8.04E-03 |
| metanephros development (GO:0001656)                                    | 88  | 3 | .10 | + | 30.52 | 1.38E-04 | 8.01E-03 |
| associative learning (GO:0008306)                                       | 88  | 3 | .10 | + | 30.52 | 1.38E-04 | 7.98E-03 |
| negative regulation of neurogenesis (GO:0050768)                        | 148 | 5 | .17 | + | 30.24 | 6.38E-07 | 1.09E-04 |
| mesonephric tubule development (GO:0072164)                             | 89  | 3 | .10 | + | 30.17 | 1.43E-04 | 8.16E-03 |
| mesonephric epithelium development (GO:0072163)                         | 89  | 3 | .10 | + | 30.17 | 1.43E-04 | 8.13E-03 |
| regulation of smoothed signaling pathway (GO:0008589)                   | 89  | 3 | .10 | + | 30.17 | 1.43E-04 | 8.10E-03 |
| morphogenesis of embryonic epithelium (GO:0016331)                      | 150 | 5 | .17 | + | 29.84 | 6.80E-07 | 1.14E-04 |
| tube formation (GO:0035148)                                             | 150 | 5 | .17 | + | 29.84 | 6.80E-07 | 1.12E-04 |
| positive regulation of mitotic cell cycle phase transition (GO:1901992) | 90  | 3 | .10 | + | 29.84 | 1.47E-04 | 8.30E-03 |
| kidney morphogenesis (GO:0060993)                                       | 90  | 3 | .10 | + | 29.84 | 1.47E-04 | 8.27E-03 |

|                                                                |     |   |     |   |       |          |          |
|----------------------------------------------------------------|-----|---|-----|---|-------|----------|----------|
| smoothened signaling pathway (GO:0007224)                      | 91  | 3 | .10 | + | 29.51 | 1.52E-04 | 8.47E-03 |
| renal tubule development (GO:0061326)                          | 91  | 3 | .10 | + | 29.51 | 1.52E-04 | 8.44E-03 |
| hippocampus development (GO:0021766)                           | 92  | 3 | .10 | + | 29.19 | 1.57E-04 | 8.68E-03 |
| regulation of stress fiber assembly (GO:0051492)               | 92  | 3 | .10 | + | 29.19 | 1.57E-04 | 8.65E-03 |
| regulation of cell-matrix adhesion (GO:0001952)                | 123 | 4 | .14 | + | 29.11 | 1.11E-05 | 1.07E-03 |
| mesonephros development (GO:0001823)                           | 93  | 3 | .10 | + | 28.88 | 1.62E-04 | 8.86E-03 |
| negative regulation of nervous system development (GO:0051961) | 155 | 5 | .17 | + | 28.88 | 7.96E-07 | 1.26E-04 |
| regulation of osteoblast differentiation (GO:0045667)          | 127 | 4 | .14 | + | 28.19 | 1.26E-05 | 1.20E-03 |
| neural tube development (GO:0021915)                           | 163 | 5 | .18 | + | 27.46 | 1.01E-06 | 1.59E-04 |
| regulation of epithelial cell apoptotic process (GO:1904035)   | 99  | 3 | .11 | + | 27.13 | 1.94E-04 | 1.03E-02 |
| negative regulation of protein kinase activity (GO:0006469)    | 200 | 6 | .22 | + | 26.86 | 8.12E-08 | 2.57E-05 |
| cellular response to decreased oxygen levels (GO:0036294)      | 134 | 4 | .15 | + | 26.72 | 1.54E-05 | 1.42E-03 |
| regulation of myeloid cell differentiation (GO:0045637)        | 202 | 6 | .23 | + | 26.59 | 8.59E-08 | 2.62E-05 |
| regulation of actomyosin structure                             | 101 | 3 | .11 | + | 26.59 | 2.05E-04 | 1.08E-02 |

|                                                                                 |     |   |     |   |       |          |          |
|---------------------------------------------------------------------------------|-----|---|-----|---|-------|----------|----------|
| organization<br>(GO:0110020)                                                    |     |   |     |   |       |          |          |
| regulation of neural precursor cell proliferation<br>(GO:2000177)               | 101 | 3 | .11 | + | 26.59 | 2.05E-04 | 1.08E-02 |
| spinal cord development<br>(GO:0021510)                                         | 102 | 3 | .11 | + | 26.33 | 2.11E-04 | 1.11E-02 |
| tissue remodeling<br>(GO:0048771)                                               | 104 | 3 | .12 | + | 25.82 | 2.23E-04 | 1.16E-02 |
| negative regulation of epithelial cell proliferation<br>(GO:0050680)            | 140 | 4 | .16 | + | 25.58 | 1.82E-05 | 1.62E-03 |
| regulation of actin filament bundle assembly<br>(GO:0032231)                    | 105 | 3 | .12 | + | 25.58 | 2.30E-04 | 1.18E-02 |
| nephron epithelium development<br>(GO:0072009)                                  | 109 | 3 | .12 | + | 24.64 | 2.56E-04 | 1.29E-02 |
| negative regulation of protein serine/threonine kinase activity<br>(GO:0071901) | 110 | 3 | .12 | + | 24.41 | 2.62E-04 | 1.32E-02 |
| negative regulation of kinase activity<br>(GO:0033673)                          | 222 | 6 | .25 | + | 24.19 | 1.48E-07 | 4.33E-05 |
| regulation of protein localization to nucleus<br>(GO:1900180)                   | 148 | 4 | .17 | + | 24.19 | 2.26E-05 | 1.86E-03 |
| myeloid leukocyte differentiation<br>(GO:0002573)                               | 150 | 4 | .17 | + | 23.87 | 2.38E-05 | 1.92E-03 |
| cellular response to oxygen levels<br>(GO:0071453)                              | 150 | 4 | .17 | + | 23.87 | 2.38E-05 | 1.91E-03 |
| positive regulation of cell cycle phase transition<br>(GO:1901989)              | 113 | 3 | .13 | + | 23.77 | 2.83E-04 | 1.42E-02 |

|                                                                  |     |   |     |   |       |          |          |
|------------------------------------------------------------------|-----|---|-----|---|-------|----------|----------|
| glial cell development (GO:0021782)                              | 114 | 3 | .13 | + | 23.56 | 2.91E-04 | 1.45E-02 |
| myelination (GO:0042552)                                         | 115 | 3 | .13 | + | 23.35 | 2.98E-04 | 1.48E-02 |
| pallium development (GO:0021543)                                 | 193 | 5 | .22 | + | 23.19 | 2.27E-06 | 3.10E-04 |
| ensheathment of neurons (GO:0007272)                             | 117 | 3 | .13 | + | 22.95 | 3.13E-04 | 1.55E-02 |
| axon ensheathment (GO:0008366)                                   | 117 | 3 | .13 | + | 22.95 | 3.13E-04 | 1.54E-02 |
| negative regulation of neuron apoptotic process (GO:0043524)     | 158 | 4 | .18 | + | 22.66 | 2.90E-05 | 2.25E-03 |
| negative regulation of cell development (GO:0010721)             | 279 | 7 | .31 | + | 22.46 | 1.87E-08 | 7.62E-06 |
| positive regulation of mitotic cell cycle (GO:0045931)           | 120 | 3 | .13 | + | 22.38 | 3.37E-04 | 1.63E-02 |
| regulation of G1/S transition of mitotic cell cycle (GO:2000045) | 164 | 4 | .18 | + | 21.83 | 3.34E-05 | 2.52E-03 |
| cellular response to hypoxia (GO:0071456)                        | 125 | 3 | .14 | + | 21.48 | 3.78E-04 | 1.80E-02 |
| mitotic cell cycle checkpoint signaling (GO:0007093)             | 127 | 3 | .14 | + | 21.15 | 3.96E-04 | 1.85E-02 |
| negative regulation of mitotic cell cycle (GO:0045930)           | 214 | 5 | .24 | + | 20.92 | 3.72E-06 | 4.59E-04 |
| cell fate commitment (GO:0045165)                                | 258 | 6 | .29 | + | 20.82 | 3.51E-07 | 7.56E-05 |
| positive regulation of cell-substrate adhesion (GO:0010811)      | 129 | 3 | .14 | + | 20.82 | 4.14E-04 | 1.92E-02 |
| MAPK cascade (GO:0000165)                                        | 216 | 5 | .24 | + | 20.72 | 3.89E-06 | 4.65E-04 |

|                                                                       |     |   |     |   |       |          |          |
|-----------------------------------------------------------------------|-----|---|-----|---|-------|----------|----------|
| cerebral cortex development (GO:0021987)                              | 130 | 3 | .15 | + | 20.66 | 4.23E-04 | 1.96E-02 |
| epithelial cell proliferation (GO:0050673)                            | 174 | 4 | .19 | + | 20.58 | 4.19E-05 | 3.04E-03 |
| endocrine system development (GO:0035270)                             | 131 | 3 | .15 | + | 20.50 | 4.33E-04 | 1.99E-02 |
| positive regulation of supramolecular fiber organization (GO:1902905) | 175 | 4 | .20 | + | 20.46 | 4.28E-05 | 3.08E-03 |
| regulation of cell-substrate adhesion (GO:0010810)                    | 219 | 5 | .24 | + | 20.44 | 4.16E-06 | 4.82E-04 |
| negative regulation of transferase activity (GO:0051348)              | 266 | 6 | .30 | + | 20.19 | 4.18E-07 | 8.32E-05 |
| gliogenesis (GO:0042063)                                              | 266 | 6 | .30 | + | 20.19 | 4.18E-07 | 8.21E-05 |
| regulation of neuron apoptotic process (GO:0043523)                   | 226 | 5 | .25 | + | 19.80 | 4.83E-06 | 5.40E-04 |
| T cell differentiation (GO:0030217)                                   | 181 | 4 | .20 | + | 19.78 | 4.87E-05 | 3.42E-03 |
| myeloid cell homeostasis (GO:0002262)                                 | 136 | 3 | .15 | + | 19.75 | 4.81E-04 | 2.19E-02 |
| branching morphogenesis of an epithelial tube (GO:0048754)            | 137 | 3 | .15 | + | 19.60 | 4.92E-04 | 2.22E-02 |
| regulation of leukocyte differentiation (GO:1902105)                  | 321 | 7 | .36 | + | 19.52 | 4.77E-08 | 1.58E-05 |
| nephron development (GO:0072006)                                      | 138 | 3 | .15 | + | 19.46 | 5.02E-04 | 2.26E-02 |
| kidney epithelium development (GO:0072073)                            | 140 | 3 | .16 | + | 19.18 | 5.23E-04 | 2.33E-02 |
| regulation of smooth muscle                                           | 142 | 3 | .16 | + | 18.91 | 5.45E-04 | 2.40E-02 |

|                                                                         |     |   |     |   |       |          |          |
|-------------------------------------------------------------------------|-----|---|-----|---|-------|----------|----------|
| cell proliferation<br>(GO:0048660)                                      |     |   |     |   |       |          |          |
| response to<br>ionizing radiation<br>(GO:0010212)                       | 143 | 3 | .16 | + | 18.78 | 5.56E-04 | 2.43E-02 |
| regulation of cell<br>cycle G1/S phase<br>transition<br>(GO:1902806)    | 191 | 4 | .21 | + | 18.75 | 5.97E-05 | 4.02E-03 |
| regulation of<br>neuron death<br>(GO:1901214)                           | 292 | 6 | .33 | + | 18.39 | 7.13E-07 | 1.15E-04 |
| negative<br>regulation of<br>neuron death<br>(GO:1901215)               | 195 | 4 | .22 | + | 18.36 | 6.46E-05 | 4.31E-03 |
| glial cell<br>differentiation<br>(GO:0010001)                           | 206 | 4 | .23 | + | 17.38 | 7.96E-05 | 5.07E-03 |
| learning<br>(GO:0007612)                                                | 156 | 3 | .17 | + | 17.21 | 7.12E-04 | 3.03E-02 |
| epithelial tube<br>morphogenesis<br>(GO:0060562)                        | 316 | 6 | .35 | + | 17.00 | 1.12E-06 | 1.72E-04 |
| leukocyte<br>differentiation<br>(GO:0002521)                            | 424 | 8 | .47 | + | 16.89 | 1.30E-08 | 5.45E-06 |
| negative<br>regulation of<br>protein<br>phosphorylation<br>(GO:0001933) | 318 | 6 | .36 | + | 16.89 | 1.16E-06 | 1.75E-04 |
| cell cycle<br>checkpoint<br>signaling<br>(GO:0000075)                   | 161 | 3 | .18 | + | 16.68 | 7.79E-04 | 3.26E-02 |
| immune system<br>development<br>(GO:0002520)                            | 165 | 3 | .18 | + | 16.28 | 8.35E-04 | 3.46E-02 |
| mitotic cell cycle<br>phase transition<br>(GO:0044772)                  | 165 | 3 | .18 | + | 16.28 | 8.35E-04 | 3.45E-02 |
| morphogenesis of<br>a branching<br>epithelium<br>(GO:0061138)           | 165 | 3 | .18 | + | 16.28 | 8.35E-04 | 3.44E-02 |
| regulation of<br>neurogenesis<br>(GO:0050767)                           | 386 | 7 | .43 | + | 16.23 | 1.64E-07 | 4.54E-05 |
| negative<br>regulation of                                               | 167 | 3 | .19 | + | 16.08 | 8.65E-04 | 3.52E-02 |

|                                                                 |     |   |     |   |       |          |          |
|-----------------------------------------------------------------|-----|---|-----|---|-------|----------|----------|
| mitotic cell cycle phase transition (GO:1901991)                |     |   |     |   |       |          |          |
| anatomical structure maturation (GO:0071695)                    | 223 | 4 | .25 | + | 16.06 | 1.08E-04 | 6.61E-03 |
| telencephalon development (GO:0021537)                          | 279 | 5 | .31 | + | 16.04 | 1.32E-05 | 1.25E-03 |
| negative regulation of MAPK cascade (GO:0043409)                | 171 | 3 | .19 | + | 15.70 | 9.25E-04 | 3.74E-02 |
| negative regulation of cell cycle phase transition (GO:1901988) | 228 | 4 | .25 | + | 15.70 | 1.17E-04 | 7.07E-03 |
| response to decreased oxygen levels (GO:0036293)                | 286 | 5 | .32 | + | 15.65 | 1.48E-05 | 1.38E-03 |
| myeloid cell differentiation (GO:0030099)                       | 286 | 5 | .32 | + | 15.65 | 1.48E-05 | 1.37E-03 |
| negative regulation of apoptotic signaling pathway (GO:2001234) | 229 | 4 | .26 | + | 15.64 | 1.19E-04 | 7.16E-03 |
| negative regulation of Wnt signaling pathway (GO:0030178)       | 172 | 3 | .19 | + | 15.61 | 9.40E-04 | 3.79E-02 |
| regulation of hemopoiesis (GO:1903706)                          | 403 | 7 | .45 | + | 15.55 | 2.18E-07 | 5.55E-05 |
| negative regulation of phosphorylation (GO:0042326)             | 348 | 6 | .39 | + | 15.43 | 1.94E-06 | 2.71E-04 |
| lymphocyte differentiation (GO:0030098)                         | 290 | 5 | .32 | + | 15.43 | 1.58E-05 | 1.44E-03 |
| morphogenesis of a branching structure (GO:0001763)             | 175 | 3 | .20 | + | 15.35 | 9.88E-04 | 3.94E-02 |
| cell maturation (GO:0048469)                                    | 175 | 3 | .20 | + | 15.35 | 9.88E-04 | 3.93E-02 |

|                                                                               |     |    |     |   |       |          |          |
|-------------------------------------------------------------------------------|-----|----|-----|---|-------|----------|----------|
| cell cycle phase transition (GO:0044770)                                      | 176 | 3  | .20 | + | 15.26 | 1.00E-03 | 3.98E-02 |
| negative regulation of DNA-binding transcription factor activity (GO:0043433) | 176 | 3  | .20 | + | 15.26 | 1.00E-03 | 3.97E-02 |
| negative regulation of cell population proliferation (GO:0008285)             | 708 | 12 | .79 | + | 15.17 | 2.86E-12 | 7.41E-09 |
| positive regulation of binding (GO:0051099)                                   | 179 | 3  | .20 | + | 15.00 | 1.05E-03 | 4.14E-02 |
| positive regulation of neurogenesis (GO:0050769)                              | 240 | 4  | .27 | + | 14.92 | 1.42E-04 | 8.14E-03 |
| negative regulation of cell cycle (GO:0045786)                                | 361 | 6  | .40 | + | 14.88 | 2.39E-06 | 3.23E-04 |
| kidney development (GO:0001822)                                               | 303 | 5  | .34 | + | 14.77 | 1.95E-05 | 1.69E-03 |
| cell-cell junction organization (GO:0045216)                                  | 182 | 3  | .20 | + | 14.76 | 1.10E-03 | 4.30E-02 |
| cell-substrate adhesion (GO:0031589)                                          | 185 | 3  | .21 | + | 14.52 | 1.16E-03 | 4.47E-02 |
| regulation of mitotic cell cycle (GO:0007346)                                 | 494 | 8  | .55 | + | 14.50 | 4.16E-08 | 1.47E-05 |
| positive regulation of cytoskeleton organization (GO:0051495)                 | 186 | 3  | .21 | + | 14.44 | 1.17E-03 | 4.52E-02 |
| regulation of epithelial cell proliferation (GO:0050678)                      | 372 | 6  | .42 | + | 14.44 | 2.83E-06 | 3.76E-04 |
| regulation of apoptotic signaling pathway (GO:2001233)                        | 375 | 6  | .42 | + | 14.32 | 2.97E-06 | 3.90E-04 |
| regulation of chromosome                                                      | 250 | 4  | .28 | + | 14.32 | 1.66E-04 | 9.00E-03 |

|                                                                                 |     |   |     |   |       |          |          |
|---------------------------------------------------------------------------------|-----|---|-----|---|-------|----------|----------|
| organization<br>(GO:0033044)                                                    |     |   |     |   |       |          |          |
| heart<br>development<br>(GO:0007507)                                            | 563 | 9 | .63 | + | 14.31 | 5.30E-09 | 2.94E-06 |
| renal system<br>development<br>(GO:0072001)                                     | 313 | 5 | .35 | + | 14.30 | 2.27E-05 | 1.86E-03 |
| response to<br>oxygen levels<br>(GO:0070482)                                    | 314 | 5 | .35 | + | 14.25 | 2.30E-05 | 1.88E-03 |
| response to light<br>stimulus<br>(GO:0009416)                                   | 316 | 5 | .35 | + | 14.16 | 2.37E-05 | 1.93E-03 |
| tissue<br>morphogenesis<br>(GO:0048729)                                         | 570 | 9 | .64 | + | 14.13 | 5.89E-09 | 2.95E-06 |
| cellular response<br>to xenobiotic<br>stimulus<br>(GO:0071466)                  | 191 | 3 | .21 | + | 14.06 | 1.27E-03 | 4.78E-02 |
| heart<br>morphogenesis<br>(GO:0003007)                                          | 255 | 4 | .28 | + | 14.04 | 1.79E-04 | 9.67E-03 |
| protein<br>localization to<br>nucleus<br>(GO:0034504)                           | 193 | 3 | .22 | + | 13.91 | 1.30E-03 | 4.88E-02 |
| negative<br>regulation of<br>protein<br>modification<br>process<br>(GO:0031400) | 462 | 7 | .52 | + | 13.56 | 5.40E-07 | 9.98E-05 |
| regulation of<br>nervous system<br>development<br>(GO:0051960)                  | 466 | 7 | .52 | + | 13.45 | 5.72E-07 | 1.02E-04 |
| regulation of<br>mitotic cell cycle<br>phase transition<br>(GO:1901990)         | 333 | 5 | .37 | + | 13.44 | 3.04E-05 | 2.35E-03 |
| regulation of Wnt<br>signaling pathway<br>(GO:0030111)                          | 334 | 5 | .37 | + | 13.40 | 3.08E-05 | 2.37E-03 |
| mononuclear cell<br>differentiation<br>(GO:1903131)                             | 335 | 5 | .37 | + | 13.36 | 3.12E-05 | 2.39E-03 |
| regulation of<br>protein stability<br>(GO:0031647)                              | 335 | 5 | .37 | + | 13.36 | 3.12E-05 | 2.38E-03 |

|                                                                  |     |   |     |   |       |          |          |
|------------------------------------------------------------------|-----|---|-----|---|-------|----------|----------|
| negative regulation of phosphate metabolic process (GO:0045936)  | 404 | 6 | .45 | + | 13.29 | 4.53E-06 | 5.13E-04 |
| negative regulation of phosphorus metabolic process (GO:0010563) | 405 | 6 | .45 | + | 13.26 | 4.59E-06 | 5.16E-04 |
| response to hypoxia (GO:0001666)                                 | 272 | 4 | .30 | + | 13.16 | 2.28E-04 | 1.18E-02 |
| negative regulation of cell cycle process (GO:0010948)           | 274 | 4 | .31 | + | 13.07 | 2.34E-04 | 1.20E-02 |
| developmental maturation (GO:0021700)                            | 278 | 4 | .31 | + | 12.88 | 2.47E-04 | 1.26E-02 |
| negative regulation of cell migration (GO:0030336)               | 286 | 4 | .32 | + | 12.52 | 2.75E-04 | 1.38E-02 |
| positive regulation of nervous system development (GO:0051962)   | 289 | 4 | .32 | + | 12.39 | 2.86E-04 | 1.43E-02 |
| regulation of cell cycle phase transition (GO:1901987)           | 434 | 6 | .48 | + | 12.38 | 6.78E-06 | 7.12E-04 |
| response to radiation (GO:0009314)                               | 445 | 6 | .50 | + | 12.07 | 7.81E-06 | 7.98E-04 |
| negative regulation of cell differentiation (GO:0045596)         | 670 | 9 | .75 | + | 12.02 | 2.34E-08 | 9.32E-06 |
| mitotic cell cycle process (GO:1903047)                          | 522 | 7 | .58 | + | 12.00 | 1.21E-06 | 1.79E-04 |
| negative regulation of cell motility (GO:2000146)                | 301 | 4 | .34 | + | 11.90 | 3.33E-04 | 1.63E-02 |
| reproductive structure development (GO:0048608)                  | 301 | 4 | .34 | + | 11.90 | 3.33E-04 | 1.62E-02 |

|                                                              |      |    |      |   |       |          |          |
|--------------------------------------------------------------|------|----|------|---|-------|----------|----------|
| hemopoiesis (GO:0030097)                                     | 685  | 9  | .77  | + | 11.76 | 2.83E-08 | 1.10E-05 |
| regulation of supramolecular fiber organization (GO:1902903) | 381  | 5  | .43  | + | 11.75 | 5.72E-05 | 3.93E-03 |
| reproductive system development (GO:0061458)                 | 305  | 4  | .34  | + | 11.74 | 3.50E-04 | 1.69E-02 |
| morphogenesis of an epithelium (GO:0002009)                  | 458  | 6  | .51  | + | 11.73 | 9.19E-06 | 9.09E-04 |
| mitotic cell cycle (GO:0000278)                              | 616  | 8  | .69  | + | 11.63 | 2.21E-07 | 5.45E-05 |
| T cell activation (GO:0042110)                               | 315  | 4  | .35  | + | 11.37 | 3.95E-04 | 1.85E-02 |
| regulation of cell cycle (GO:0051726)                        | 1120 | 14 | 1.25 | + | 11.19 | 1.10E-12 | 3.43E-09 |
| regulation of cell cycle process (GO:0010564)                | 725  | 9  | .81  | + | 11.11 | 4.58E-08 | 1.55E-05 |
| forebrain development (GO:0030900)                           | 409  | 5  | .46  | + | 10.94 | 7.96E-05 | 5.05E-03 |
| chordate embryonic development (GO:0043009)                  | 661  | 8  | .74  | + | 10.83 | 3.76E-07 | 7.68E-05 |
| regulation of cell development (GO:0060284)                  | 829  | 10 | .93  | + | 10.80 | 8.36E-09 | 3.61E-06 |
| muscle tissue development (GO:0060537)                       | 334  | 4  | .37  | + | 10.72 | 4.92E-04 | 2.23E-02 |
| camera-type eye development (GO:0043010)                     | 337  | 4  | .38  | + | 10.63 | 5.08E-04 | 2.28E-02 |
| negative regulation of locomotion (GO:0040013)               | 338  | 4  | .38  | + | 10.59 | 5.14E-04 | 2.30E-02 |
| gland development (GO:0048732)                               | 425  | 5  | .47  | + | 10.53 | 9.52E-05 | 5.92E-03 |
| regulation of intracellular transport (GO:0032386)           | 340  | 4  | .38  | + | 10.53 | 5.25E-04 | 2.33E-02 |

|                                                                       |      |    |      |   |       |          |          |
|-----------------------------------------------------------------------|------|----|------|---|-------|----------|----------|
| embryo development ending in birth or egg hatching (GO:0009792)       | 683  | 8  | .76  | + | 10.49 | 4.81E-07 | 9.10E-05 |
| response to xenobiotic stimulus (GO:0009410)                          | 433  | 5  | .48  | + | 10.34 | 1.04E-04 | 6.40E-03 |
| negative regulation of intracellular signal transduction (GO:1902532) | 524  | 6  | .59  | + | 10.25 | 1.95E-05 | 1.69E-03 |
| regulation of protein kinase activity (GO:0045859)                    | 615  | 7  | .69  | + | 10.19 | 3.54E-06 | 4.44E-04 |
| positive regulation of cell development (GO:0010720)                  | 441  | 5  | .49  | + | 10.15 | 1.13E-04 | 6.86E-03 |
| negative regulation of catalytic activity (GO:0043086)                | 630  | 7  | .70  | + | 9.95  | 4.15E-06 | 4.84E-04 |
| chromosome organization (GO:0051276)                                  | 456  | 5  | .51  | + | 9.82  | 1.32E-04 | 7.74E-03 |
| regulation of transferase activity (GO:0051338)                       | 847  | 9  | .95  | + | 9.51  | 1.70E-07 | 4.64E-05 |
| apoptotic process (GO:0006915)                                        | 1047 | 11 | 1.17 | + | 9.40  | 4.74E-09 | 2.94E-06 |
| positive regulation of cell differentiation (GO:0045597)              | 857  | 9  | .96  | + | 9.40  | 1.88E-07 | 5.03E-05 |
| lymphocyte activation (GO:0046649)                                    | 478  | 5  | .53  | + | 9.36  | 1.64E-04 | 8.95E-03 |
| eye development (GO:0001654)                                          | 385  | 4  | .43  | + | 9.30  | 8.32E-04 | 3.46E-02 |
| visual system development (GO:0150063)                                | 389  | 4  | .43  | + | 9.20  | 8.65E-04 | 3.52E-02 |
| tube morphogenesis (GO:0035239)                                       | 684  | 7  | .76  | + | 9.16  | 7.08E-06 | 7.28E-04 |

|                                                            |      |    |      |   |      |          |          |
|------------------------------------------------------------|------|----|------|---|------|----------|----------|
| regulation of cell population proliferation (GO:0042127)   | 1674 | 17 | 1.87 | + | 9.09 | 2.01E-14 | 3.12E-10 |
| embryonic morphogenesis (GO:0048598)                       | 591  | 6  | .66  | + | 9.09 | 3.82E-05 | 2.85E-03 |
| sensory system development (GO:0048880)                    | 395  | 4  | .44  | + | 9.07 | 9.15E-04 | 3.71E-02 |
| animal organ morphogenesis (GO:0009887)                    | 991  | 10 | 1.11 | + | 9.03 | 4.48E-08 | 1.55E-05 |
| programmed cell death (GO:0012501)                         | 1093 | 11 | 1.22 | + | 9.01 | 7.39E-09 | 3.48E-06 |
| in utero embryonic development (GO:0001701)                | 401  | 4  | .45  | + | 8.93 | 9.67E-04 | 3.88E-02 |
| cell death (GO:0008219)                                    | 1105 | 11 | 1.23 | + | 8.91 | 8.27E-09 | 3.67E-06 |
| regulation of kinase activity (GO:0043549)                 | 709  | 7  | .79  | + | 8.84 | 8.93E-06 | 8.89E-04 |
| positive regulation of organelle organization (GO:0010638) | 508  | 5  | .57  | + | 8.81 | 2.17E-04 | 1.13E-02 |
| negative regulation of developmental process (GO:0051093)  | 919  | 9  | 1.03 | + | 8.77 | 3.38E-07 | 7.39E-05 |
| circulatory system development (GO:0072359)                | 926  | 9  | 1.03 | + | 8.70 | 3.60E-07 | 7.66E-05 |
| regulation of cell differentiation (GO:0045595)            | 1558 | 15 | 1.74 | + | 8.62 | 4.44E-12 | 9.85E-09 |
| cell population proliferation (GO:0008283)                 | 729  | 7  | .81  | + | 8.60 | 1.07E-05 | 1.04E-03 |
| negative regulation of signal transduction (GO:0009968)    | 1266 | 12 | 1.41 | + | 8.49 | 2.19E-09 | 1.62E-06 |
| negative regulation of molecular                           | 975  | 9  | 1.09 | + | 8.26 | 5.54E-07 | 1.00E-04 |

|                                                                           |      |    |      |   |      |          |          |
|---------------------------------------------------------------------------|------|----|------|---|------|----------|----------|
| function<br>(GO:0044092)                                                  |      |    |      |   |      |          |          |
| regulation of protein localization<br>(GO:0032880)                        | 874  | 8  | .98  | + | 8.19 | 3.01E-06 | 3.93E-04 |
| negative regulation of transcription by RNA polymerase II<br>(GO:0000122) | 985  | 9  | 1.10 | + | 8.18 | 6.03E-07 | 1.06E-04 |
| negative regulation of protein metabolic process<br>(GO:0051248)          | 986  | 9  | 1.10 | + | 8.17 | 6.08E-07 | 1.06E-04 |
| cell cycle process<br>(GO:0022402)                                        | 881  | 8  | .98  | + | 8.13 | 3.19E-06 | 4.10E-04 |
| negative regulation of apoptotic process<br>(GO:0043066)                  | 892  | 8  | 1.00 | + | 8.03 | 3.50E-06 | 4.42E-04 |
| response to abiotic stimulus<br>(GO:0009628)                              | 1118 | 10 | 1.25 | + | 8.01 | 1.38E-07 | 4.11E-05 |
| tube development<br>(GO:0035295)                                          | 900  | 8  | 1.01 | + | 7.96 | 3.73E-06 | 4.57E-04 |
| negative regulation of cell communication<br>(GO:0010648)                 | 1361 | 12 | 1.52 | + | 7.89 | 4.94E-09 | 2.95E-06 |
| negative regulation of signaling<br>(GO:0023057)                          | 1362 | 12 | 1.52 | + | 7.89 | 4.98E-09 | 2.87E-06 |
| positive regulation of hydrolase activity<br>(GO:0051345)                 | 571  | 5  | .64  | + | 7.84 | 3.71E-04 | 1.77E-02 |
| cell morphogenesis<br>(GO:0000902)                                        | 687  | 6  | .77  | + | 7.82 | 8.74E-05 | 5.45E-03 |
| negative regulation of programmed cell death<br>(GO:0043069)              | 920  | 8  | 1.03 | + | 7.78 | 4.39E-06 | 5.05E-04 |
| regulation of multicellular organismal                                    | 1401 | 12 | 1.57 | + | 7.67 | 6.84E-09 | 3.32E-06 |

|                                                                       |      |    |      |   |      |          |          |
|-----------------------------------------------------------------------|------|----|------|---|------|----------|----------|
| development (GO:2000026)                                              |      |    |      |   |      |          |          |
| embryo development (GO:0009790)                                       | 1054 | 9  | 1.18 | + | 7.64 | 1.06E-06 | 1.64E-04 |
| positive regulation of developmental process (GO:0051094)             | 1319 | 11 | 1.47 | + | 7.47 | 5.09E-08 | 1.65E-05 |
| anatomical structure formation involved in morphogenesis (GO:0048646) | 961  | 8  | 1.07 | + | 7.45 | 6.04E-06 | 6.52E-04 |
| leukocyte activation (GO:0045321)                                     | 601  | 5  | .67  | + | 7.45 | 4.68E-04 | 2.13E-02 |
| head development (GO:0060322)                                         | 847  | 7  | .95  | + | 7.40 | 2.80E-05 | 2.18E-03 |
| protein localization to organelle (GO:0033365)                        | 731  | 6  | .82  | + | 7.35 | 1.23E-04 | 7.27E-03 |
| epithelium development (GO:0060429)                                   | 1103 | 9  | 1.23 | + | 7.30 | 1.54E-06 | 2.19E-04 |
| regulation of cellular localization (GO:0060341)                      | 981  | 8  | 1.10 | + | 7.30 | 7.03E-06 | 7.27E-04 |
| negative regulation of cellular metabolic process (GO:0031324)        | 2217 | 18 | 2.48 | + | 7.27 | 7.94E-14 | 6.16E-10 |
| negative regulation of DNA-templated transcription (GO:0045892)       | 1327 | 10 | 1.48 | + | 6.75 | 6.69E-07 | 1.13E-04 |
| brain development (GO:0007420)                                        | 798  | 6  | .89  | + | 6.73 | 1.97E-04 | 1.05E-02 |
| regulation of apoptotic process (GO:0042981)                          | 1471 | 11 | 1.64 | + | 6.69 | 1.54E-07 | 4.35E-05 |
| regulation of protein                                                 | 1071 | 8  | 1.20 | + | 6.69 | 1.33E-05 | 1.25E-03 |

|                                                                            |      |    |      |   |      |          |          |
|----------------------------------------------------------------------------|------|----|------|---|------|----------|----------|
| phosphorylation<br>(GO:0001932)                                            |      |    |      |   |      |          |          |
| negative regulation of RNA biosynthetic process<br>(GO:1902679)            | 1341 | 10 | 1.50 | + | 6.68 | 7.36E-07 | 1.18E-04 |
| regulation of MAPK cascade<br>(GO:0043408)                                 | 672  | 5  | .75  | + | 6.66 | 7.75E-04 | 3.25E-02 |
| positive regulation of cell population proliferation<br>(GO:0008284)       | 950  | 7  | 1.06 | + | 6.60 | 5.80E-05 | 3.95E-03 |
| negative regulation of response to stimulus<br>(GO:0048585)                | 1637 | 12 | 1.83 | + | 6.56 | 3.88E-08 | 1.40E-05 |
| regulation of programmed cell death<br>(GO:0043067)                        | 1521 | 11 | 1.70 | + | 6.47 | 2.16E-07 | 5.60E-05 |
| positive regulation of catalytic activity<br>(GO:0043085)                  | 1112 | 8  | 1.24 | + | 6.44 | 1.75E-05 | 1.59E-03 |
| negative regulation of nitrogen compound metabolic process<br>(GO:0051172) | 2376 | 17 | 2.65 | + | 6.40 | 6.08E-12 | 1.18E-08 |
| negative regulation of multicellular organismal process<br>(GO:0051241)    | 1125 | 8  | 1.26 | + | 6.37 | 1.90E-05 | 1.67E-03 |
| cell cycle<br>(GO:0007049)                                                 | 1270 | 9  | 1.42 | + | 6.34 | 4.90E-06 | 5.39E-04 |
| regulation of cell motility<br>(GO:2000145)                                | 991  | 7  | 1.11 | + | 6.32 | 7.56E-05 | 4.93E-03 |
| intracellular signal transduction<br>(GO:0035556)                          | 1558 | 11 | 1.74 | + | 6.32 | 2.75E-07 | 6.48E-05 |
| negative regulation of macromolecule biosynthetic                          | 1560 | 11 | 1.74 | + | 6.31 | 2.79E-07 | 6.47E-05 |

|                                                                                                         |      |    |      |   |      |              |              |
|---------------------------------------------------------------------------------------------------------|------|----|------|---|------|--------------|--------------|
| process<br>(GO:0010558)                                                                                 |      |    |      |   |      |              |              |
| negative<br>regulation of<br>nucleobase-<br>containing<br>compound<br>metabolic process<br>(GO:0045934) | 1568 | 11 | 1.75 | + | 6.28 | 2.94E-<br>07 | 6.71E-<br>05 |
| regulation of<br>protein<br>modification<br>process<br>(GO:0031399)                                     | 1443 | 10 | 1.61 | + | 6.20 | 1.44E-<br>06 | 2.08E-<br>04 |
| cell activation<br>(GO:0001775)                                                                         | 724  | 5  | .81  | + | 6.18 | 1.08E-<br>03 | 4.24E-<br>02 |
| negative<br>regulation of<br>macromolecule<br>metabolic process<br>(GO:0010605)                         | 2755 | 19 | 3.08 | + | 6.17 | 1.38E-<br>13 | 7.12E-<br>10 |
| negative<br>regulation of RNA<br>metabolic process<br>(GO:0051253)                                      | 1451 | 10 | 1.62 | + | 6.17 | 1.51E-<br>06 | 2.17E-<br>04 |
| negative<br>regulation of<br>cellular<br>biosynthetic<br>process<br>(GO:0031327)                        | 1601 | 11 | 1.79 | + | 6.15 | 3.62E-<br>07 | 7.60E-<br>05 |
| tissue<br>development<br>(GO:0009888)                                                                   | 1753 | 12 | 1.96 | + | 6.13 | 8.28E-<br>08 | 2.57E-<br>05 |
| regulation of<br>phosphorylation<br>(GO:0042325)                                                        | 1170 | 8  | 1.31 | + | 6.12 | 2.52E-<br>05 | 2.00E-<br>03 |
| regulation of<br>organelle<br>organization<br>(GO:0033043)                                              | 1175 | 8  | 1.31 | + | 6.09 | 2.60E-<br>05 | 2.04E-<br>03 |
| regulation of<br>locomotion<br>(GO:0040012)                                                             | 1036 | 7  | 1.16 | + | 6.05 | 9.99E-<br>05 | 6.18E-<br>03 |
| anatomical<br>structure<br>morphogenesis<br>(GO:0009653)                                                | 2244 | 15 | 2.51 | + | 5.98 | 7.86E-<br>10 | 8.14E-<br>07 |
| negative<br>regulation of<br>biosynthetic                                                               | 1650 | 11 | 1.84 | + | 5.97 | 4.90E-<br>07 | 9.17E-<br>05 |

|                                                             |      |    |      |   |      |          |          |
|-------------------------------------------------------------|------|----|------|---|------|----------|----------|
| process<br>(GO:0009890)                                     |      |    |      |   |      |          |          |
| central nervous system development<br>(GO:0007417)          | 1069 | 7  | 1.19 | + | 5.86 | 1.21E-04 | 7.22E-03 |
| regulation of developmental process<br>(GO:0050793)         | 2462 | 16 | 2.75 | + | 5.82 | 1.94E-10 | 3.02E-07 |
| regulation of cell migration<br>(GO:0030334)                | 933  | 6  | 1.04 | + | 5.76 | 4.55E-04 | 2.08E-02 |
| negative regulation of metabolic process<br>(GO:0009892)    | 2985 | 19 | 3.33 | + | 5.70 | 5.98E-13 | 2.32E-09 |
| negative regulation of gene expression<br>(GO:0010629)      | 955  | 6  | 1.07 | + | 5.62 | 5.15E-04 | 2.30E-02 |
| regulation of cellular component biogenesis<br>(GO:0044087) | 968  | 6  | 1.08 | + | 5.55 | 5.53E-04 | 2.43E-02 |
| regulation of phosphate metabolic process<br>(GO:0019220)   | 1315 | 8  | 1.47 | + | 5.45 | 5.79E-05 | 3.96E-03 |
| generation of neurons<br>(GO:0048699)                       | 1151 | 7  | 1.29 | + | 5.44 | 1.92E-04 | 1.03E-02 |
| regulation of phosphorus metabolic process<br>(GO:0051174)  | 1316 | 8  | 1.47 | + | 5.44 | 5.82E-05 | 3.95E-03 |
| neurogenesis<br>(GO:0022008)                                | 1321 | 8  | 1.48 | + | 5.42 | 5.98E-05 | 4.01E-03 |
| regulation of catalytic activity<br>(GO:0050790)            | 1827 | 11 | 2.04 | + | 5.39 | 1.35E-06 | 1.98E-04 |
| positive regulation of gene expression<br>(GO:0010628)      | 1173 | 7  | 1.31 | + | 5.34 | 2.16E-04 | 1.13E-02 |
| positive regulation of molecular function<br>(GO:0044093)   | 1519 | 9  | 1.70 | + | 5.30 | 2.08E-05 | 1.75E-03 |

|                                                                      |      |    |      |   |      |          |          |
|----------------------------------------------------------------------|------|----|------|---|------|----------|----------|
| regulation of multicellular organismal process (GO:0051239)          | 2983 | 17 | 3.33 | + | 5.10 | 2.37E-10 | 3.07E-07 |
| cell-cell signaling (GO:0007267)                                     | 1092 | 6  | 1.22 | + | 4.92 | 1.04E-03 | 4.10E-02 |
| animal organ development (GO:0048513)                                | 2925 | 16 | 3.27 | + | 4.90 | 2.56E-09 | 1.73E-06 |
| positive regulation of multicellular organismal process (GO:0051240) | 1654 | 9  | 1.85 | + | 4.87 | 4.08E-05 | 2.99E-03 |
| regulation of immune system process (GO:0002682)                     | 1488 | 8  | 1.66 | + | 4.81 | 1.38E-04 | 8.06E-03 |
| positive regulation of cellular component organization (GO:0051130)  | 1118 | 6  | 1.25 | + | 4.80 | 1.17E-03 | 4.51E-02 |
| regulation of protein metabolic process (GO:0051246)                 | 2462 | 13 | 2.75 | + | 4.73 | 3.71E-07 | 7.69E-05 |
| cell surface receptor signaling pathway (GO:0007166)                 | 2093 | 11 | 2.34 | + | 4.70 | 5.15E-06 | 5.63E-04 |
| cellular response to oxygen-containing compound (GO:1901701)         | 1146 | 6  | 1.28 | + | 4.69 | 1.33E-03 | 4.97E-02 |
| protein localization (GO:0008104)                                    | 1936 | 10 | 2.16 | + | 4.62 | 1.99E-05 | 1.70E-03 |
| cellular macromolecule localization (GO:0070727)                     | 1942 | 10 | 2.17 | + | 4.61 | 2.04E-05 | 1.73E-03 |
| regulation of transport (GO:0051049)                                 | 1776 | 9  | 1.98 | + | 4.54 | 7.14E-05 | 4.70E-03 |
| regulation of molecular function (GO:0065009)                        | 2569 | 13 | 2.87 | + | 4.53 | 6.11E-07 | 1.05E-04 |

|                                                                                      |      |    |      |   |      |          |          |
|--------------------------------------------------------------------------------------|------|----|------|---|------|----------|----------|
| cell development (GO:0048468)                                                        | 2185 | 11 | 2.44 | + | 4.51 | 7.82E-06 | 7.94E-04 |
| nervous system development (GO:0007399)                                              | 2233 | 11 | 2.49 | + | 4.41 | 9.65E-06 | 9.48E-04 |
| system development (GO:0048731)                                                      | 3553 | 17 | 3.97 | + | 4.28 | 3.83E-09 | 2.48E-06 |
| regulation of localization (GO:0032879)                                              | 2131 | 10 | 2.38 | + | 4.20 | 4.58E-05 | 3.25E-03 |
| regulation of signal transduction (GO:0009966)                                       | 2992 | 14 | 3.34 | + | 4.19 | 4.24E-07 | 8.23E-05 |
| positive regulation of DNA-templated transcription (GO:0045893)                      | 1716 | 8  | 1.92 | + | 4.17 | 3.68E-04 | 1.76E-02 |
| positive regulation of RNA biosynthetic process (GO:1902680)                         | 1723 | 8  | 1.92 | + | 4.16 | 3.78E-04 | 1.79E-02 |
| regulation of intracellular signal transduction (GO:1902531)                         | 1727 | 8  | 1.93 | + | 4.15 | 3.84E-04 | 1.81E-02 |
| macromolecule localization (GO:0033036)                                              | 2377 | 11 | 2.66 | + | 4.14 | 1.76E-05 | 1.58E-03 |
| multicellular organism development (GO:0007275)                                      | 3966 | 18 | 4.43 | + | 4.06 | 1.69E-09 | 1.31E-06 |
| positive regulation of nucleobase-containing compound metabolic process (GO:0045935) | 2052 | 9  | 2.29 | + | 3.93 | 2.18E-04 | 1.13E-02 |
| positive regulation of RNA metabolic process (GO:0051254)                            | 1856 | 8  | 2.07 | + | 3.86 | 6.25E-04 | 2.71E-02 |
| regulation of transcription by RNA polymerase II (GO:0006357)                        | 2594 | 11 | 2.90 | + | 3.80 | 4.03E-05 | 2.97E-03 |

|                                                                        |      |    |      |   |      |          |          |
|------------------------------------------------------------------------|------|----|------|---|------|----------|----------|
| regulation of signaling (GO:0023051)                                   | 3396 | 14 | 3.79 | + | 3.69 | 2.05E-06 | 2.85E-04 |
| positive regulation of macromolecule biosynthetic process (GO:0010557) | 1942 | 8  | 2.17 | + | 3.69 | 8.45E-04 | 3.47E-02 |
| regulation of cell communication (GO:0010646)                          | 3405 | 14 | 3.80 | + | 3.68 | 2.12E-06 | 2.92E-04 |
| regulation of cellular component organization (GO:0051128)             | 2439 | 10 | 2.72 | + | 3.67 | 1.45E-04 | 8.19E-03 |
| cellular localization (GO:0051641)                                     | 2700 | 11 | 3.02 | + | 3.65 | 5.88E-05 | 3.97E-03 |
| regulation of response to stimulus (GO:0048583)                        | 3960 | 16 | 4.42 | + | 3.62 | 2.18E-07 | 5.46E-05 |
| negative regulation of cellular process (GO:0048523)                   | 4705 | 19 | 5.26 | + | 3.61 | 2.26E-09 | 1.60E-06 |
| protein-containing complex organization (GO:0043933)                   | 1984 | 8  | 2.22 | + | 3.61 | 9.74E-04 | 3.90E-02 |
| positive regulation of cellular metabolic process (GO:0031325)         | 2976 | 12 | 3.32 | + | 3.61 | 2.39E-05 | 1.91E-03 |
| positive regulation of cellular biosynthetic process (GO:0031328)      | 2022 | 8  | 2.26 | + | 3.54 | 1.10E-03 | 4.31E-02 |
| positive regulation of metabolic process (GO:0009893)                  | 3825 | 15 | 4.27 | + | 3.51 | 1.18E-06 | 1.76E-04 |
| cell differentiation (GO:0030154)                                      | 3590 | 14 | 4.01 | + | 3.49 | 4.07E-06 | 4.78E-04 |
| cellular developmental process (GO:0048869)                            | 3614 | 14 | 4.04 | + | 3.47 | 4.41E-06 | 5.04E-04 |

|                                                                         |      |    |      |   |      |          |          |
|-------------------------------------------------------------------------|------|----|------|---|------|----------|----------|
| positive regulation of nitrogen compound metabolic process (GO:0051173) | 3121 | 12 | 3.49 | + | 3.44 | 3.89E-05 | 2.89E-03 |
| positive regulation of biosynthetic process (GO:0009891)                | 2081 | 8  | 2.32 | + | 3.44 | 1.33E-03 | 4.98E-02 |
| regulation of cellular metabolic process (GO:0031323)                   | 5482 | 21 | 6.12 | + | 3.43 | 1.24E-10 | 2.13E-07 |
| regulation of DNA-templated transcription (GO:0006355)                  | 3450 | 13 | 3.85 | + | 3.37 | 1.77E-05 | 1.58E-03 |
| negative regulation of biological process (GO:0048519)                  | 5320 | 20 | 5.94 | + | 3.37 | 1.37E-09 | 1.33E-06 |
| cellular response to chemical stimulus (GO:0070887)                     | 2397 | 9  | 2.68 | + | 3.36 | 6.99E-04 | 2.98E-02 |
| regulation of RNA biosynthetic process (GO:2001141)                     | 3473 | 13 | 3.88 | + | 3.35 | 1.91E-05 | 1.67E-03 |
| regulation of nitrogen compound metabolic process (GO:0051171)          | 5646 | 21 | 6.31 | + | 3.33 | 2.25E-10 | 3.17E-07 |
| positive regulation of macromolecule metabolic process (GO:0010604)     | 3514 | 13 | 3.93 | + | 3.31 | 2.18E-05 | 1.81E-03 |
| regulation of primary metabolic process (GO:0080090)                    | 5825 | 21 | 6.51 | + | 3.23 | 4.23E-10 | 5.05E-07 |
| regulation of macromolecule biosynthetic process (GO:0010556)           | 3961 | 14 | 4.42 | + | 3.16 | 1.34E-05 | 1.25E-03 |
| regulation of gene expression (GO:0010468)                              | 4888 | 17 | 5.46 | + | 3.11 | 5.45E-07 | 9.95E-05 |

|                                                                             |      |    |      |   |      |          |          |
|-----------------------------------------------------------------------------|------|----|------|---|------|----------|----------|
| anatomical structure development (GO:0048856)                               | 5201 | 18 | 5.81 | + | 3.10 | 1.54E-07 | 4.43E-05 |
| regulation of nucleobase-containing compound metabolic process (GO:0019219) | 4051 | 14 | 4.53 | + | 3.09 | 1.76E-05 | 1.59E-03 |
| regulation of RNA metabolic process (GO:0051252)                            | 3766 | 13 | 4.21 | + | 3.09 | 4.67E-05 | 3.30E-03 |
| positive regulation of cellular process (GO:0048522)                        | 5511 | 19 | 6.16 | + | 3.09 | 3.73E-08 | 1.38E-05 |
| regulation of cellular biosynthetic process (GO:0031326)                    | 4068 | 14 | 4.54 | + | 3.08 | 1.85E-05 | 1.63E-03 |
| regulation of macromolecule metabolic process (GO:0060255)                  | 6188 | 21 | 6.91 | + | 3.04 | 1.43E-09 | 1.31E-06 |
| regulation of biosynthetic process (GO:0009889)                             | 4177 | 14 | 4.67 | + | 3.00 | 2.53E-05 | 2.00E-03 |
| signal transduction (GO:0007165)                                            | 4819 | 16 | 5.38 | + | 2.97 | 3.56E-06 | 4.43E-04 |
| cell communication (GO:0007154)                                             | 5278 | 17 | 5.90 | + | 2.88 | 1.74E-06 | 2.46E-04 |
| developmental process (GO:0032502)                                          | 5702 | 18 | 6.37 | + | 2.83 | 6.89E-07 | 1.13E-04 |
| signaling (GO:0023052)                                                      | 5119 | 16 | 5.72 | + | 2.80 | 8.27E-06 | 8.28E-04 |
| regulation of metabolic process (GO:0019222)                                | 6719 | 21 | 7.51 | + | 2.80 | 7.50E-09 | 3.43E-06 |
| response to chemical (GO:0042221)                                           | 3899 | 12 | 4.36 | + | 2.76 | 3.57E-04 | 1.71E-02 |
| cellular component organization (GO:0016043)                                | 5560 | 17 | 6.21 | + | 2.74 | 3.81E-06 | 4.62E-04 |

|                                                            |       |    |       |   |      |          |          |
|------------------------------------------------------------|-------|----|-------|---|------|----------|----------|
| positive regulation of biological process (GO:0048518)     | 6219  | 19 | 6.95  | + | 2.73 | 3.09E-07 | 6.86E-05 |
| cellular component organization or biogenesis (GO:0071840) | 5774  | 17 | 6.45  | + | 2.64 | 6.68E-06 | 7.05E-04 |
| multicellular organismal process (GO:0032501)              | 6713  | 19 | 7.50  | + | 2.53 | 1.16E-06 | 1.76E-04 |
| cellular response to stimulus (GO:0051716)                 | 6472  | 18 | 7.23  | + | 2.49 | 5.26E-06 | 5.71E-04 |
| response to stimulus (GO:0050896)                          | 8243  | 19 | 9.21  | + | 2.06 | 4.47E-05 | 3.18E-03 |
| regulation of cellular process (GO:0050794)                | 11039 | 22 | 12.33 | + | 1.78 | 2.01E-05 | 1.71E-03 |
| regulation of biological process (GO:0050789)              | 11806 | 22 | 13.19 | + | 1.67 | 6.52E-05 | 4.33E-03 |
| biological regulation (GO:0065007)                         | 12228 | 22 | 13.66 | + | 1.61 | 1.51E-04 | 8.41E-03 |
