# Supplementary material
Source: HighWire-hosted journal article supplement (https://bmjophth.bmj.com/content/9/1/e001565)
Supplement: inline-supplementary-material-3 [file inline-supplementary-material-3.pdf]

**Supplementary Table 3: PANTHER Overrepresentation Test (Haploinsufficient Breast Cancer-Associated Genes)**

| Analysis Type: PANTHER Overrepresentation Test (Released 20221013)                                           |                                |                           |                                  |                                    |                                         |                                     |                             |
|--------------------------------------------------------------------------------------------------------------|--------------------------------|---------------------------|----------------------------------|------------------------------------|-----------------------------------------|-------------------------------------|-----------------------------|
| Annotation Version and Release Date: GO Ontology database DOI: 10.5281/zenodo.7942786<br>Released 2023-05-10 |                                |                           |                                  |                                    |                                         |                                     |                             |
| Analyzed List: Client Text Box Input (Homo sapiens)                                                          |                                |                           |                                  |                                    |                                         |                                     |                             |
| Reference List: Homo sapiens (all genes in database)                                                         |                                |                           |                                  |                                    |                                         |                                     |                             |
| Test Type: FISHER                                                                                            |                                |                           |                                  |                                    |                                         |                                     |                             |
| Correction: FDR                                                                                              |                                |                           |                                  |                                    |                                         |                                     |                             |
| GO biological process complete                                                                               | Homo sapiens - REFLIST (20589) | Client Text Box Input (6) | Client Text Box Input (expected) | Client Text Box Input (over/under) | Client Text Box Input (fold Enrichment) | Client Text Box Input (raw P-value) | Client Text Box Input (FDR) |
| anoikis (GO:0043276)                                                                                         | 12                             | 3                         | .00                              | +                                  | > 100                                   | 6.24E-09                            | 9.70E-05                    |
| response to UV-B (GO:0010224)                                                                                | 21                             | 2                         | .01                              | +                                  | > 100                                   | 1.78E-05                            | 1.11E-02                    |
| positive regulation of nitric-oxide synthase activity (GO:0051000)                                           | 22                             | 2                         | .01                              | +                                  | > 100                                   | 1.95E-05                            | 1.04E-02                    |
| insulin-like growth factor receptor signaling pathway (GO:0048009)                                           | 31                             | 2                         | .01                              | +                                  | > 100                                   | 3.72E-05                            | 1.44E-02                    |
| positive regulation of monooxygenase activity (GO:0032770)                                                   | 32                             | 2                         | .01                              | +                                  | > 100                                   | 3.95E-05                            | 1.50E-02                    |
| negative regulation of macroautophagy (GO:0016242)                                                           | 32                             | 2                         | .01                              | +                                  | > 100                                   | 3.95E-05                            | 1.46E-02                    |
| response to pain (GO:0048265)                                                                                | 34                             | 2                         | .01                              | +                                  | > 100                                   | 4.44E-05                            | 1.50E-02                    |
| protein localization to chromatin (GO:0071168)                                                               | 35                             | 2                         | .01                              | +                                  | > 100                                   | 4.69E-05                            | 1.55E-02                    |
| regulation of nitric-oxide synthase activity (GO:0050999)                                                    | 38                             | 2                         | .01                              | +                                  | > 100                                   | 5.49E-05                            | 1.61E-02                    |
| T cell costimulation (GO:0031295)                                                                            | 40                             | 2                         | .01                              | +                                  | > 100                                   | 6.06E-05                            | 1.65E-02                    |
| lymphocyte costimulation (GO:0031294)                                                                        | 42                             | 2                         | .01                              | +                                  | > 100                                   | 6.65E-05                            | 1.72E-02                    |

|                                                                                       |    |   |     |   |       |          |          |
|---------------------------------------------------------------------------------------|----|---|-----|---|-------|----------|----------|
| positive regulation of glucose metabolic process (GO:0010907)                         | 42 | 2 | .01 | + | > 100 | 6.65E-05 | 1.69E-02 |
| positive regulation of nitric oxide biosynthetic process (GO:0045429)                 | 43 | 2 | .01 | + | > 100 | 6.96E-05 | 1.72E-02 |
| phosphatidylinositol 3-kinase signaling (GO:0014065)                                  | 43 | 2 | .01 | + | > 100 | 6.96E-05 | 1.69E-02 |
| cellular response to vascular endothelial growth factor stimulus (GO:0035924)         | 45 | 2 | .01 | + | > 100 | 7.60E-05 | 1.74E-02 |
| positive regulation of nitric oxide metabolic process (GO:1904407)                    | 45 | 2 | .01 | + | > 100 | 7.60E-05 | 1.71E-02 |
| regulation of extrinsic apoptotic signaling pathway in absence of ligand (GO:2001239) | 46 | 2 | .01 | + | > 100 | 7.93E-05 | 1.73E-02 |
| prostate gland development (GO:0030850)                                               | 46 | 2 | .01 | + | > 100 | 7.93E-05 | 1.71E-02 |
| regulation of monooxygenase activity (GO:0032768)                                     | 51 | 2 | .01 | + | > 100 | 9.68E-05 | 1.95E-02 |
| epidermal growth factor receptor signaling pathway (GO:0007173)                       | 52 | 2 | .02 | + | > 100 | 1.01E-04 | 1.95E-02 |
| positive regulation of TOR signaling (GO:0032008)                                     | 52 | 2 | .02 | + | > 100 | 1.01E-04 | 1.93E-02 |
| protein kinase B signaling (GO:0043491)                                               | 52 | 2 | .02 | + | > 100 | 1.01E-04 | 1.90E-02 |
| regulation of TORC1 signaling (GO:1903432)                                            | 52 | 2 | .02 | + | > 100 | 1.01E-04 | 1.88E-02 |
| intrinsic apoptotic signaling pathway by p53 class mediator (GO:0072332)              | 57 | 2 | .02 | + | > 100 | 1.20E-04 | 2.12E-02 |
| regulation of nitric oxide biosynthetic                                               | 58 | 2 | .02 | + | > 100 | 1.24E-04 | 2.12E-02 |

|                                                                              |     |   |     |   |       |          |          |
|------------------------------------------------------------------------------|-----|---|-----|---|-------|----------|----------|
| process<br>(GO:0045428)                                                      |     |   |     |   |       |          |          |
| maternal process<br>involved in female<br>pregnancy<br>(GO:0060135)          | 61  | 2 | .02 | + | > 100 | 1.37E-04 | 2.29E-02 |
| mammary gland<br>epithelium<br>development<br>(GO:0061180)                   | 62  | 2 | .02 | + | > 100 | 1.41E-04 | 2.31E-02 |
| positive regulation<br>of oxidoreductase<br>activity<br>(GO:0051353)         | 63  | 2 | .02 | + | > 100 | 1.46E-04 | 2.31E-02 |
| regulation of nitric<br>oxide metabolic<br>process<br>(GO:0080164)           | 63  | 2 | .02 | + | > 100 | 1.46E-04 | 2.29E-02 |
| ERBB signaling<br>pathway<br>(GO:0038127)                                    | 64  | 2 | .02 | + | > 100 | 1.50E-04 | 2.34E-02 |
| urogenital system<br>development<br>(GO:0001655)                             | 64  | 2 | .02 | + | > 100 | 1.50E-04 | 2.31E-02 |
| peptidyl-threonine<br>phosphorylation<br>(GO:0018107)                        | 68  | 2 | .02 | + | > 100 | 1.69E-04 | 2.50E-02 |
| insulin receptor<br>signaling pathway<br>(GO:0008286)                        | 68  | 2 | .02 | + | > 100 | 1.69E-04 | 2.48E-02 |
| response to activity<br>(GO:0014823)                                         | 70  | 2 | .02 | + | 98.04 | 1.79E-04 | 2.55E-02 |
| positive regulation<br>of peptidyl-serine<br>phosphorylation<br>(GO:0033138) | 108 | 3 | .03 | + | 95.32 | 3.01E-06 | 6.68E-03 |
| endothelial cell<br>migration<br>(GO:0043542)                                | 72  | 2 | .02 | + | 95.32 | 1.89E-04 | 2.67E-02 |
| phosphatidylinositol-<br>mediated signaling<br>(GO:0048015)                  | 76  | 2 | .02 | + | 90.30 | 2.10E-04 | 2.87E-02 |
| regulation of TOR<br>signaling<br>(GO:0032006)                               | 116 | 3 | .03 | + | 88.75 | 3.71E-06 | 7.21E-03 |
| peptidyl-threonine<br>modification<br>(GO:0018210)                           | 78  | 2 | .02 | + | 87.99 | 2.21E-04 | 2.99E-02 |
| positive regulation<br>of carbohydrate                                       | 78  | 2 | .02 | + | 87.99 | 2.21E-04 | 2.96E-02 |

|                                                                         |     |   |     |   |       |          |          |
|-------------------------------------------------------------------------|-----|---|-----|---|-------|----------|----------|
| metabolic process<br>(GO:0045913)                                       |     |   |     |   |       |          |          |
| inositol lipid-mediated signaling<br>(GO:0048017)                       | 80  | 2 | .02 | + | 85.79 | 2.32E-04 | 3.01E-02 |
| protein localization to chromosome<br>(GO:0034502)                      | 81  | 2 | .02 | + | 84.73 | 2.38E-04 | 3.03E-02 |
| multicellular organismal response to stress<br>(GO:0033555)             | 83  | 2 | .02 | + | 82.69 | 2.50E-04 | 3.15E-02 |
| positive regulation of smooth muscle cell proliferation<br>(GO:0048661) | 85  | 2 | .02 | + | 80.74 | 2.62E-04 | 3.23E-02 |
| negative regulation of autophagy<br>(GO:0010507)                        | 87  | 2 | .03 | + | 78.89 | 2.74E-04 | 3.35E-02 |
| signal transduction by p53 class mediator<br>(GO:0072331)               | 91  | 2 | .03 | + | 75.42 | 2.99E-04 | 3.55E-02 |
| regulation of peptidyl-serine phosphorylation<br>(GO:0033135)           | 140 | 3 | .04 | + | 73.53 | 6.46E-06 | 1.11E-02 |
| positive regulation of protein localization to nucleus<br>(GO:1900182)  | 94  | 2 | .03 | + | 73.01 | 3.19E-04 | 3.67E-02 |
| regulation of carbohydrate biosynthetic process<br>(GO:0043255)         | 98  | 2 | .03 | + | 70.03 | 3.46E-04 | 3.75E-02 |
| response to UV<br>(GO:0009411)                                          | 153 | 3 | .04 | + | 67.28 | 8.39E-06 | 1.18E-02 |
| regulation of glucose metabolic process<br>(GO:0010906)                 | 102 | 2 | .03 | + | 67.28 | 3.74E-04 | 3.95E-02 |
| epithelial cell migration<br>(GO:0010631)                               | 102 | 2 | .03 | + | 67.28 | 3.74E-04 | 3.92E-02 |
| regulation of oxidoreductase activity<br>(GO:0051341)                   | 103 | 2 | .03 | + | 66.63 | 3.81E-04 | 3.97E-02 |
| regulation of generation of precursor                                   | 104 | 2 | .03 | + | 65.99 | 3.88E-04 | 4.02E-02 |

|                                                                      |     |   |     |   |       |          |          |
|----------------------------------------------------------------------|-----|---|-----|---|-------|----------|----------|
| metabolites and energy (GO:0043467)                                  |     |   |     |   |       |          |          |
| epithelium migration (GO:0090132)                                    | 105 | 2 | .03 | + | 65.36 | 3.96E-04 | 4.04E-02 |
| regulation of signal transduction by p53 class mediator (GO:1901796) | 107 | 2 | .03 | + | 64.14 | 4.11E-04 | 4.14E-02 |
| regulation of protein kinase B signaling (GO:0051896)                | 167 | 3 | .05 | + | 61.64 | 1.09E-05 | 1.12E-02 |
| tissue migration (GO:0090130)                                        | 112 | 2 | .03 | + | 61.28 | 4.49E-04 | 4.44E-02 |
| positive regulation of protein kinase B signaling (GO:0051897)       | 113 | 2 | .03 | + | 60.73 | 4.57E-04 | 4.43E-02 |
| T cell receptor signaling pathway (GO:0050852)                       | 113 | 2 | .03 | + | 60.73 | 4.57E-04 | 4.41E-02 |
| glucose metabolic process (GO:0006006)                               | 120 | 2 | .03 | + | 57.19 | 5.14E-04 | 4.84E-02 |
| negative regulation of neuron death (GO:1901215)                     | 195 | 3 | .06 | + | 52.79 | 1.71E-05 | 1.16E-02 |
| ameboidal-type cell migration (GO:0001667)                           | 200 | 3 | .06 | + | 51.47 | 1.85E-05 | 1.10E-02 |
| glucose homeostasis (GO:0042593)                                     | 203 | 3 | .06 | + | 50.71 | 1.93E-05 | 1.07E-02 |
| carbohydrate homeostasis (GO:0033500)                                | 204 | 3 | .06 | + | 50.46 | 1.96E-05 | 1.01E-02 |
| regulation of neuron death (GO:1901214)                              | 292 | 3 | .09 | + | 35.26 | 5.64E-05 | 1.62E-02 |
| reproductive structure development (GO:0048608)                      | 301 | 3 | .09 | + | 34.20 | 6.16E-05 | 1.65E-02 |
| reproductive system development (GO:0061458)                         | 305 | 3 | .09 | + | 33.75 | 6.41E-05 | 1.69E-02 |
| response to light stimulus (GO:0009416)                              | 316 | 3 | .09 | + | 32.58 | 7.11E-05 | 1.67E-02 |
| gland development (GO:0048732)                                       | 425 | 4 | .12 | + | 32.30 | 2.69E-06 | 8.37E-03 |
| positive regulation of lymphocyte                                    | 330 | 3 | .10 | + | 31.20 | 8.08E-05 | 1.72E-02 |

|                                                                                    |     |   |     |   |       |          |          |
|------------------------------------------------------------------------------------|-----|---|-----|---|-------|----------|----------|
| activation<br>(GO:0051251)                                                         |     |   |     |   |       |          |          |
| regulation of autophagy<br>(GO:0010506)                                            | 352 | 3 | .10 | + | 29.25 | 9.77E-05 | 1.95E-02 |
| positive regulation of cell projection organization<br>(GO:0031346)                | 354 | 3 | .10 | + | 29.08 | 9.94E-05 | 1.95E-02 |
| response to peptide hormone<br>(GO:0043434)                                        | 373 | 3 | .11 | + | 27.60 | 1.16E-04 | 2.07E-02 |
| positive regulation of leukocyte activation<br>(GO:0002696)                        | 379 | 3 | .11 | + | 27.16 | 1.21E-04 | 2.10E-02 |
| positive regulation of cell activation<br>(GO:0050867)                             | 396 | 3 | .12 | + | 26.00 | 1.38E-04 | 2.28E-02 |
| transmembrane receptor protein tyrosine kinase signaling pathway<br>(GO:0007169)   | 423 | 3 | .12 | + | 24.34 | 1.68E-04 | 2.51E-02 |
| positive regulation of kinase activity<br>(GO:0033674)                             | 430 | 3 | .13 | + | 23.94 | 1.76E-04 | 2.53E-02 |
| response to radiation<br>(GO:0009314)                                              | 445 | 3 | .13 | + | 23.13 | 1.95E-04 | 2.72E-02 |
| regulation of neuron projection development<br>(GO:0010975)                        | 450 | 3 | .13 | + | 22.88 | 2.01E-04 | 2.79E-02 |
| response to peptide<br>(GO:1901652)                                                | 454 | 3 | .13 | + | 22.68 | 2.07E-04 | 2.84E-02 |
| regulation of plasma membrane bounded cell projection organization<br>(GO:0120035) | 643 | 4 | .19 | + | 21.35 | 1.38E-05 | 1.07E-02 |
| positive regulation of cell adhesion<br>(GO:0045785)                               | 486 | 3 | .14 | + | 21.18 | 2.52E-04 | 3.16E-02 |
| regulation of cell projection organization<br>(GO:0031344)                         | 657 | 4 | .19 | + | 20.89 | 1.50E-05 | 1.06E-02 |
| regulation of lymphocyte                                                           | 504 | 3 | .15 | + | 20.43 | 2.81E-04 | 3.40E-02 |

|                                                                       |     |   |     |   |       |          |          |
|-----------------------------------------------------------------------|-----|---|-----|---|-------|----------|----------|
| activation (GO:0051249)                                               |     |   |     |   |       |          |          |
| cellular response to hormone stimulus (GO:0032870)                    | 510 | 3 | .15 | + | 20.19 | 2.91E-04 | 3.47E-02 |
| response to lipid (GO:0033993)                                        | 854 | 5 | .25 | + | 20.09 | 7.23E-07 | 5.61E-03 |
| tube morphogenesis (GO:0035239)                                       | 684 | 4 | .20 | + | 20.07 | 1.76E-05 | 1.14E-02 |
| positive regulation of transferase activity (GO:0051347)              | 523 | 3 | .15 | + | 19.68 | 3.13E-04 | 3.65E-02 |
| negative regulation of intracellular signal transduction (GO:1902532) | 524 | 3 | .15 | + | 19.65 | 3.15E-04 | 3.65E-02 |
| cellular response to lipid (GO:0071396)                               | 527 | 3 | .15 | + | 19.53 | 3.20E-04 | 3.65E-02 |
| positive regulation of protein phosphorylation (GO:0001934)           | 711 | 4 | .21 | + | 19.31 | 2.04E-05 | 1.02E-02 |
| regulation of immune response (GO:0050776)                            | 889 | 5 | .26 | + | 19.30 | 8.82E-07 | 4.57E-03 |
| vasculature development (GO:0001944)                                  | 546 | 3 | .16 | + | 18.85 | 3.55E-04 | 3.83E-02 |
| protein localization to organelle (GO:0033365)                        | 731 | 4 | .21 | + | 18.78 | 2.28E-05 | 1.07E-02 |
| positive regulation of hydrolase activity (GO:0051345)                | 571 | 3 | .17 | + | 18.03 | 4.05E-04 | 4.11E-02 |
| positive regulation of phosphorylation (GO:0042327)                   | 771 | 4 | .22 | + | 17.80 | 2.81E-05 | 1.18E-02 |
| response to hormone (GO:0009725)                                      | 791 | 4 | .23 | + | 17.35 | 3.11E-05 | 1.24E-02 |
| multicellular organismal-level homeostasis (GO:0048871)               | 594 | 3 | .17 | + | 17.33 | 4.54E-04 | 4.43E-02 |
| regulation of leukocyte activation (GO:0002694)                       | 596 | 3 | .17 | + | 17.27 | 4.59E-04 | 4.40E-02 |
| regulation of growth (GO:0040008)                                     | 624 | 3 | .18 | + | 16.50 | 5.24E-04 | 4.85E-02 |

|                                                                  |      |   |     |   |       |          |          |
|------------------------------------------------------------------|------|---|-----|---|-------|----------|----------|
| positive regulation of phosphorus metabolic process (GO:0010562) | 845  | 4 | .25 | + | 16.24 | 4.02E-05 | 1.45E-02 |
| positive regulation of phosphate metabolic process (GO:0045937)  | 845  | 4 | .25 | + | 16.24 | 4.02E-05 | 1.42E-02 |
| phosphorylation (GO:0016310)                                     | 884  | 4 | .26 | + | 15.53 | 4.80E-05 | 1.55E-02 |
| multicellular organismal reproductive process (GO:0048609)       | 887  | 4 | .26 | + | 15.47 | 4.87E-05 | 1.54E-02 |
| positive regulation of catalytic activity (GO:0043085)           | 1112 | 5 | .32 | + | 15.43 | 2.67E-06 | 1.04E-02 |
| tube development (GO:0035295)                                    | 900  | 4 | .26 | + | 15.25 | 5.15E-05 | 1.54E-02 |
| multicellular organism reproduction (GO:0032504)                 | 930  | 4 | .27 | + | 14.76 | 5.86E-05 | 1.65E-02 |
| positive regulation of protein modification process (GO:0031401) | 935  | 4 | .27 | + | 14.68 | 5.98E-05 | 1.66E-02 |
| developmental process involved in reproduction (GO:0003006)      | 967  | 4 | .28 | + | 14.19 | 6.83E-05 | 1.71E-02 |
| positive regulation of immune system process (GO:0002684)        | 977  | 4 | .28 | + | 14.05 | 7.11E-05 | 1.70E-02 |
| apoptotic process (GO:0006915)                                   | 1047 | 4 | .31 | + | 13.11 | 9.31E-05 | 1.90E-02 |
| regulation of protein phosphorylation (GO:0001932)               | 1071 | 4 | .31 | + | 12.82 | 1.02E-04 | 1.88E-02 |
| programmed cell death (GO:0012501)                               | 1093 | 4 | .32 | + | 12.56 | 1.10E-04 | 2.01E-02 |
| cell death (GO:0008219)                                          | 1105 | 4 | .32 | + | 12.42 | 1.15E-04 | 2.08E-02 |
| response to abiotic stimulus (GO:0009628)                        | 1118 | 4 | .33 | + | 12.28 | 1.20E-04 | 2.10E-02 |
| cellular response to oxygen-containing compound (GO:1901701)     | 1146 | 4 | .33 | + | 11.98 | 1.32E-04 | 2.24E-02 |



|                                                                      |      |   |     |   |       |          |          |
|----------------------------------------------------------------------|------|---|-----|---|-------|----------|----------|
| regulation of phosphorylation (GO:0042325)                           | 1170 | 4 | .34 | + | 11.73 | 1.44E-04 | 2.32E-02 |
| positive regulation of gene expression (GO:0010628)                  | 1173 | 4 | .34 | + | 11.70 | 1.45E-04 | 2.32E-02 |
| regulation of apoptotic process (GO:0042981)                         | 1471 | 5 | .43 | + | 11.66 | 1.06E-05 | 1.18E-02 |
| regulation of immune system process (GO:0002682)                     | 1488 | 5 | .43 | + | 11.53 | 1.12E-05 | 1.09E-02 |
| positive regulation of molecular function (GO:0044093)               | 1519 | 5 | .44 | + | 11.30 | 1.24E-05 | 1.07E-02 |
| regulation of programmed cell death (GO:0043067)                     | 1521 | 5 | .44 | + | 11.28 | 1.25E-05 | 1.02E-02 |
| intracellular signal transduction (GO:0035556)                       | 1558 | 5 | .45 | + | 11.01 | 1.41E-05 | 1.04E-02 |
| regulation of phosphate metabolic process (GO:0019220)               | 1315 | 4 | .38 | + | 10.44 | 2.26E-04 | 3.00E-02 |
| regulation of phosphorus metabolic process (GO:0051174)              | 1316 | 4 | .38 | + | 10.43 | 2.27E-04 | 2.99E-02 |
| positive regulation of developmental process (GO:0051094)            | 1319 | 4 | .38 | + | 10.41 | 2.29E-04 | 2.99E-02 |
| positive regulation of multicellular organismal process (GO:0051240) | 1654 | 5 | .48 | + | 10.37 | 1.89E-05 | 1.09E-02 |
| response to oxygen-containing compound (GO:1901700)                  | 1681 | 5 | .49 | + | 10.21 | 2.04E-05 | 9.92E-03 |
| regulation of intracellular signal transduction (GO:1902531)         | 1727 | 5 | .50 | + | 9.93  | 2.34E-05 | 1.07E-02 |
| positive regulation of protein metabolic process (GO:0051247)        | 1425 | 4 | .42 | + | 9.63  | 3.09E-04 | 3.64E-02 |

|                                                                |      |   |     |   |      |          |          |
|----------------------------------------------------------------|------|---|-----|---|------|----------|----------|
| regulation of protein modification process (GO:0031399)        | 1443 | 4 | .42 | + | 9.51 | 3.24E-04 | 3.68E-02 |
| reproductive process (GO:0022414)                              | 1448 | 4 | .42 | + | 9.48 | 3.29E-04 | 3.70E-02 |
| reproduction (GO:0000003)                                      | 1458 | 4 | .42 | + | 9.41 | 3.38E-04 | 3.77E-02 |
| regulation of catalytic activity (GO:0050790)                  | 1827 | 5 | .53 | + | 9.39 | 3.08E-05 | 1.26E-02 |
| response to endogenous stimulus (GO:0009719)                   | 1464 | 4 | .43 | + | 9.38 | 3.43E-04 | 3.75E-02 |
| positive regulation of signal transduction (GO:0009967)        | 1549 | 4 | .45 | + | 8.86 | 4.27E-04 | 4.25E-02 |
| cellular response to stress (GO:0033554)                       | 1603 | 4 | .47 | + | 8.56 | 4.87E-04 | 4.64E-02 |
| regulation of developmental process (GO:0050793)               | 2462 | 6 | .72 | + | 8.36 | 2.95E-06 | 7.62E-03 |
| cell development (GO:0048468)                                  | 2185 | 5 | .64 | + | 7.85 | 7.41E-05 | 1.72E-02 |
| positive regulation of response to stimulus (GO:0048584)       | 2203 | 5 | .64 | + | 7.79 | 7.71E-05 | 1.71E-02 |
| anatomical structure morphogenesis (GO:0009653)                | 2244 | 5 | .65 | + | 7.65 | 8.44E-05 | 1.77E-02 |
| immune system process (GO:0002376)                             | 2277 | 5 | .66 | + | 7.54 | 9.06E-05 | 1.88E-02 |
| animal organ development (GO:0048513)                          | 2925 | 6 | .85 | + | 7.04 | 8.27E-06 | 1.28E-02 |
| positive regulation of cellular metabolic process (GO:0031325) | 2976 | 6 | .87 | + | 6.92 | 9.17E-06 | 1.19E-02 |
| regulation of multicellular organismal process (GO:0051239)    | 2983 | 6 | .87 | + | 6.90 | 9.31E-06 | 1.11E-02 |
| regulation of molecular function (GO:0065009)                  | 2569 | 5 | .75 | + | 6.68 | 1.63E-04 | 2.49E-02 |

|                                                                         |      |   |      |   |      |          |          |
|-------------------------------------------------------------------------|------|---|------|---|------|----------|----------|
| response to organic substance (GO:0010033)                              | 2592 | 5 | .76  | + | 6.62 | 1.71E-04 | 2.48E-02 |
| positive regulation of nitrogen compound metabolic process (GO:0051173) | 3121 | 6 | .91  | + | 6.60 | 1.22E-05 | 1.11E-02 |
| positive regulation of macromolecule metabolic process (GO:0010604)     | 3514 | 6 | 1.02 | + | 5.86 | 2.48E-05 | 1.10E-02 |
| system development (GO:0048731)                                         | 3553 | 6 | 1.04 | + | 5.79 | 2.65E-05 | 1.14E-02 |
| negative regulation of metabolic process (GO:0009892)                   | 2985 | 5 | .87  | + | 5.75 | 3.39E-04 | 3.76E-02 |
| regulation of signal transduction (GO:0009966)                          | 2992 | 5 | .87  | + | 5.73 | 3.43E-04 | 3.78E-02 |
| positive regulation of metabolic process (GO:0009893)                   | 3825 | 6 | 1.11 | + | 5.38 | 4.13E-05 | 1.43E-02 |
| regulation of response to stimulus (GO:0048583)                         | 3960 | 6 | 1.15 | + | 5.20 | 5.08E-05 | 1.58E-02 |
| multicellular organism development (GO:0007275)                         | 3966 | 6 | 1.16 | + | 5.19 | 5.13E-05 | 1.56E-02 |
| signal transduction (GO:0007165)                                        | 4819 | 6 | 1.40 | + | 4.27 | 1.65E-04 | 2.49E-02 |
| signaling (GO:0023052)                                                  | 5119 | 6 | 1.49 | + | 4.02 | 2.37E-04 | 3.04E-02 |
| anatomical structure development (GO:0048856)                           | 5201 | 6 | 1.52 | + | 3.96 | 2.61E-04 | 3.24E-02 |
| cell communication (GO:0007154)                                         | 5278 | 6 | 1.54 | + | 3.90 | 2.85E-04 | 3.43E-02 |
| regulation of cellular metabolic process (GO:0031323)                   | 5482 | 6 | 1.60 | + | 3.76 | 3.57E-04 | 3.83E-02 |
| positive regulation of cellular process (GO:0048522)                    | 5511 | 6 | 1.61 | + | 3.74 | 3.69E-04 | 3.92E-02 |
| cellular component organization (GO:0016043)                            | 5560 | 6 | 1.62 | + | 3.70 | 3.89E-04 | 4.00E-02 |
| regulation of nitrogen compound                                         | 5646 | 6 | 1.65 | + | 3.65 | 4.26E-04 | 4.27E-02 |

|                                                                     |      |   |      |   |      |          |          |
|---------------------------------------------------------------------|------|---|------|---|------|----------|----------|
| metabolic process<br>(GO:0051171)                                   |      |   |      |   |      |          |          |
| developmental<br>process<br>(GO:0032502)                            | 5702 | 6 | 1.66 | + | 3.61 | 4.52E-04 | 4.45E-02 |
| cellular component<br>organization or<br>biogenesis<br>(GO:0071840) | 5774 | 6 | 1.68 | + | 3.57 | 4.88E-04 | 4.62E-02 |
| regulation of<br>primary metabolic<br>process<br>(GO:0080090)       | 5825 | 6 | 1.70 | + | 3.53 | 5.14E-04 | 4.81E-02 |
| cellular metabolic<br>process<br>(GO:0044237)                       | 5828 | 6 | 1.70 | + | 3.53 | 5.16E-04 | 4.80E-02 |
